# Supplementary material for: Computer-Aided Design and Synthesis of (Functionalized quinazoline)–(α-substituted coumarin)–arylsulfonate Conjugates against Chikungunya Virus
Source: MDPI journal article supplement (doi:10.3390/ijms23147646), 2022-07-11
Supplement: s1 [file s1]

**Revised. II**

**Computer-aided design and synthesis of (functionalized quinazoline)–  
( $\alpha$ -substituted coumarin)–arylsulfonate conjugates  
against chikungunya virus**

Jih Ru Hwu,<sup>1,2,\*</sup> Animesh Roy,<sup>1</sup> Shwu-Chen Tsay,<sup>1,2</sup> Wen-Chieh Huang,<sup>1,2</sup> Chun-Cheng Lin,<sup>1,2</sup> Kuo Chu Hwang,<sup>1,2</sup> Yu-Chen Hu,<sup>2,3</sup> Fa-Kuen Shieh,<sup>4</sup> Pieter Leyssen,<sup>5</sup> Johan Neyts<sup>5</sup>

<sup>1</sup>*Department of Chemistry, National Tsing Hua University, Hsinchu 300044, Taiwan*

<sup>2</sup>*Frontier Research Center on Fundamental and Applied Sciences of Matters, National Tsing Hua University, Hsinchu 300044, Taiwan*

<sup>3</sup>*Department of Chemical Engineering, National Tsing Hua University, Hsinchu 300044, Taiwan*

<sup>4</sup>*Department of Chemistry, National Central University, Zhongli City 320317, Taiwan*

<sup>5</sup>*Rega Institute for Medical Research, Katholieke Universiteit Leuven, Minderbroedersstraat 10, B-3000 Leuven, Belgium*

**\*Corresponding Author**

*E-mail addresses:* jrhwu@mx.nthu.edu.tw (J.R. Hwu)

# <sup>1</sup>H NMR, <sup>13</sup>C NMR, and IR Spectra of New Compounds

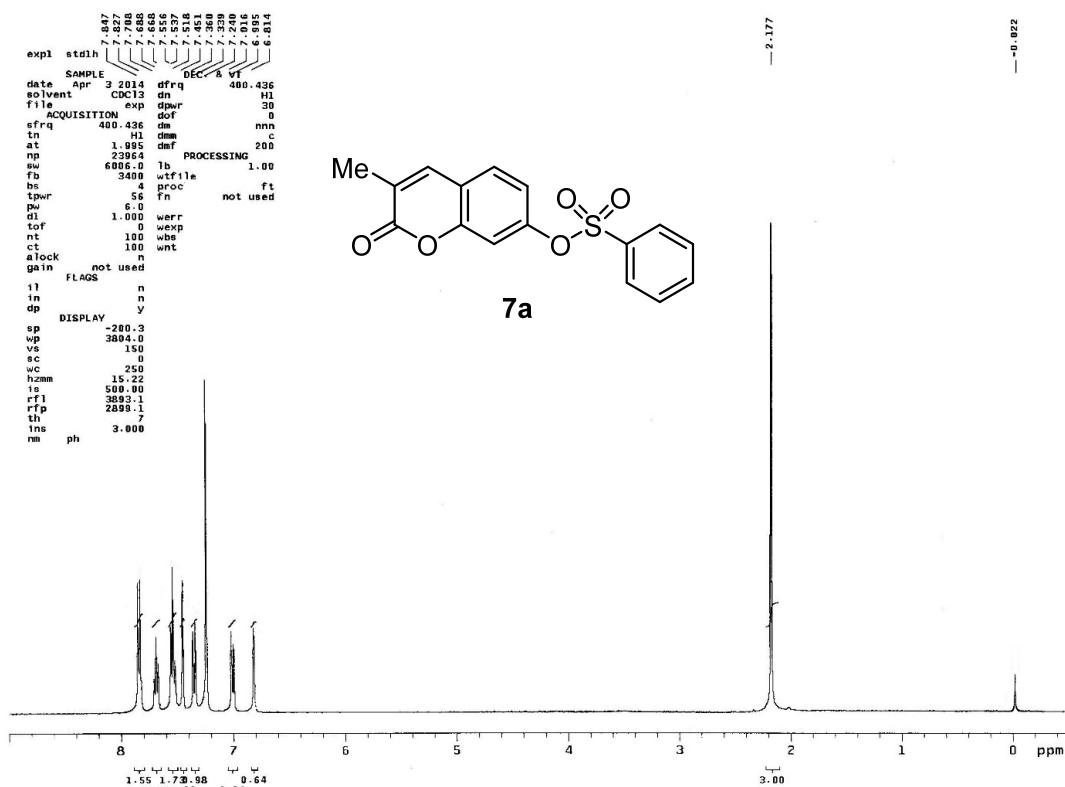

<sup>1</sup>H NMR spectrum of compound 7a

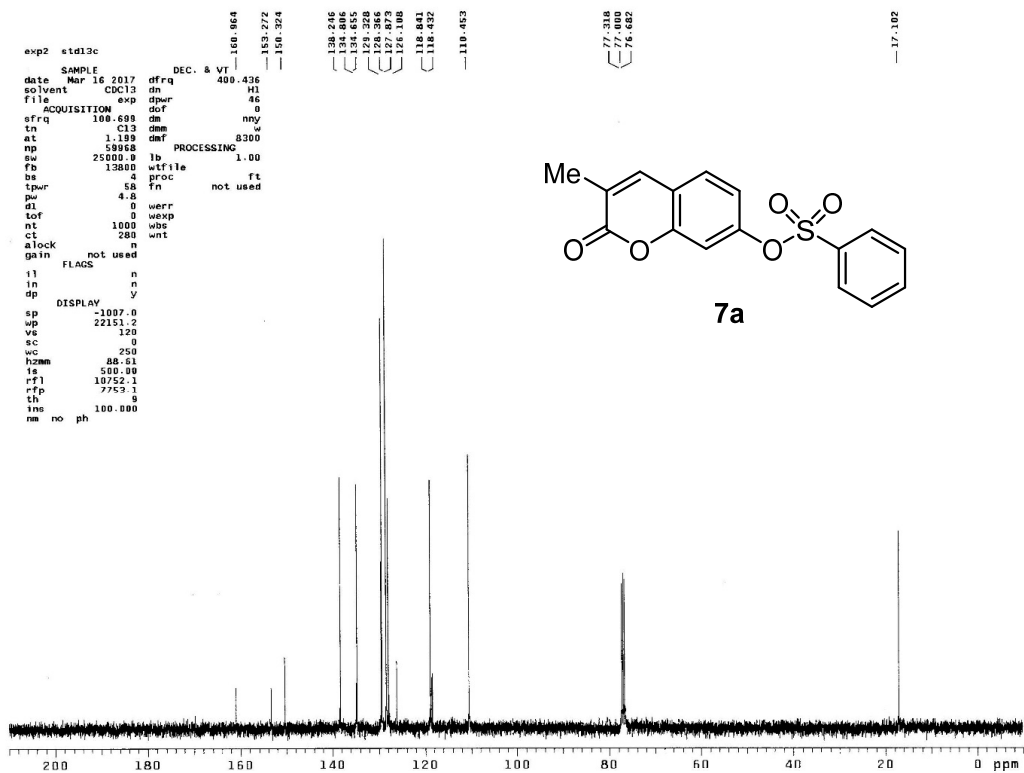

<sup>13</sup>C NMR spectrum of compound 7a

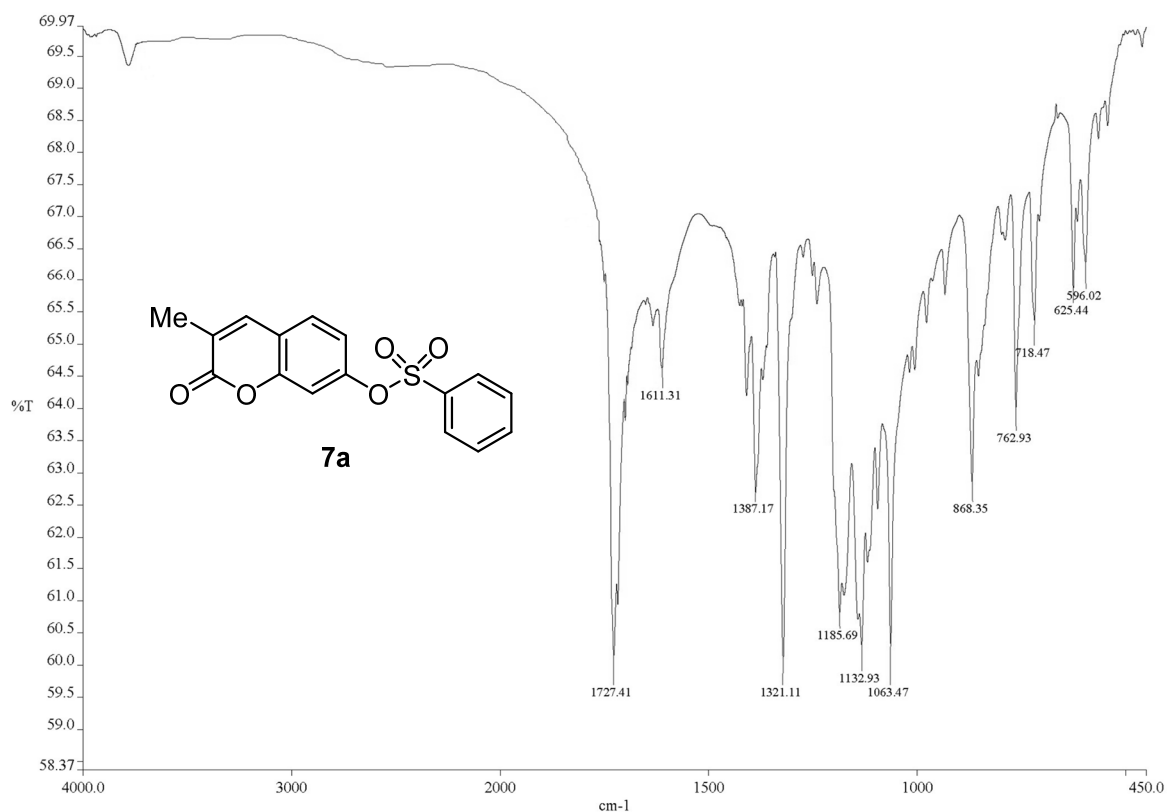

IR spectrum of compound **7a**

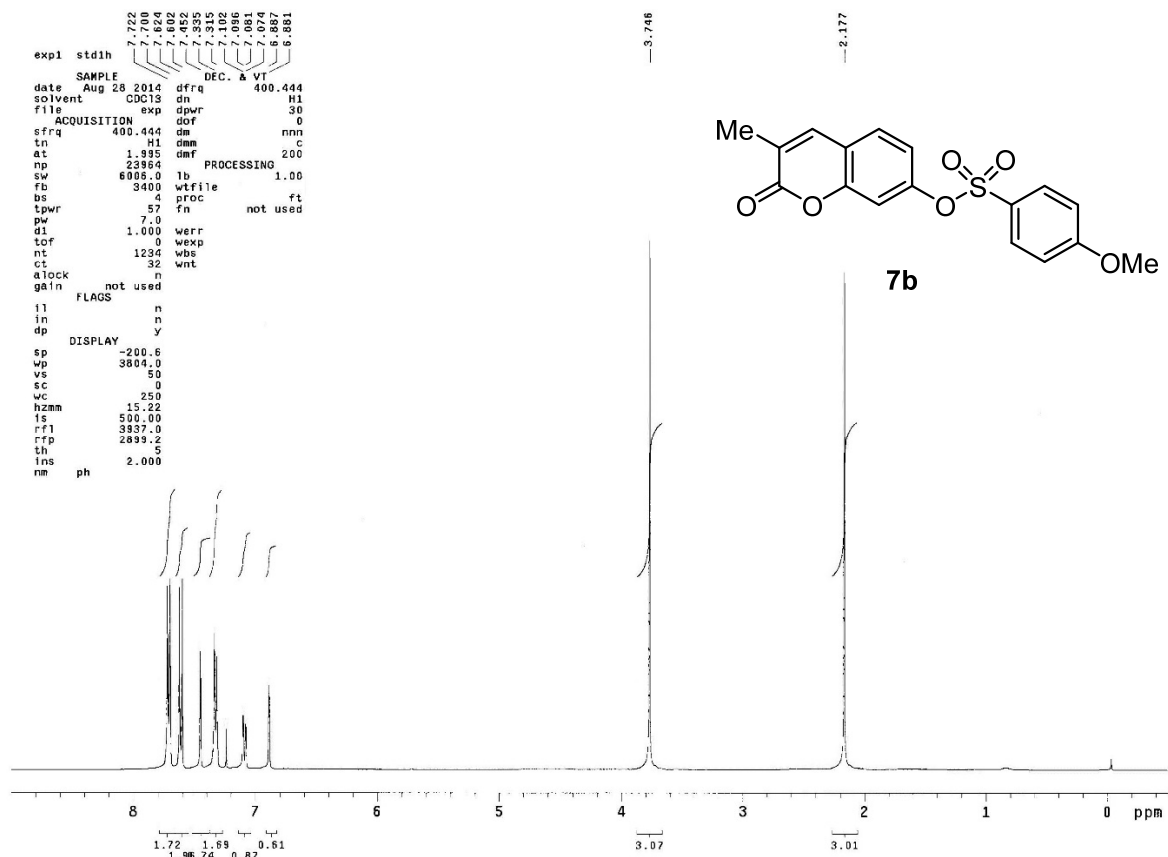

<sup>1</sup>H NMR spectrum of compound **7b**

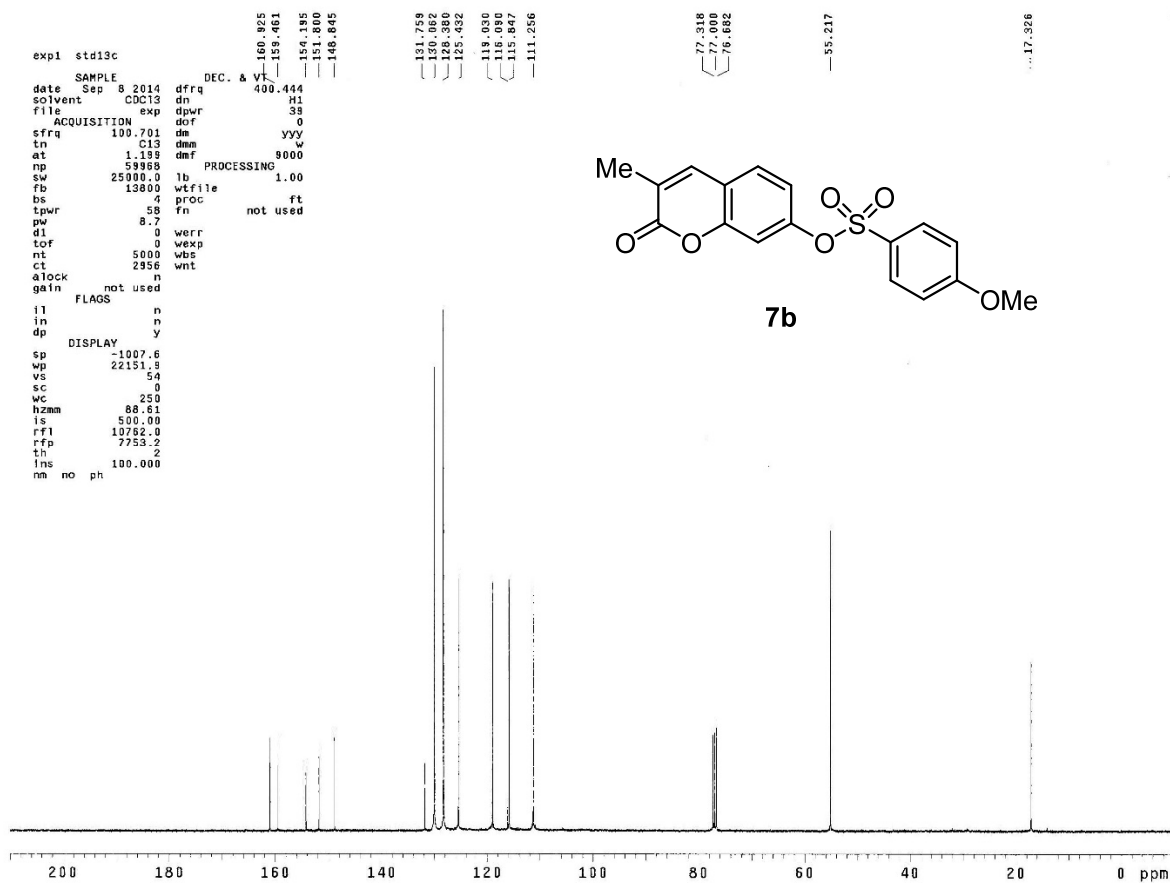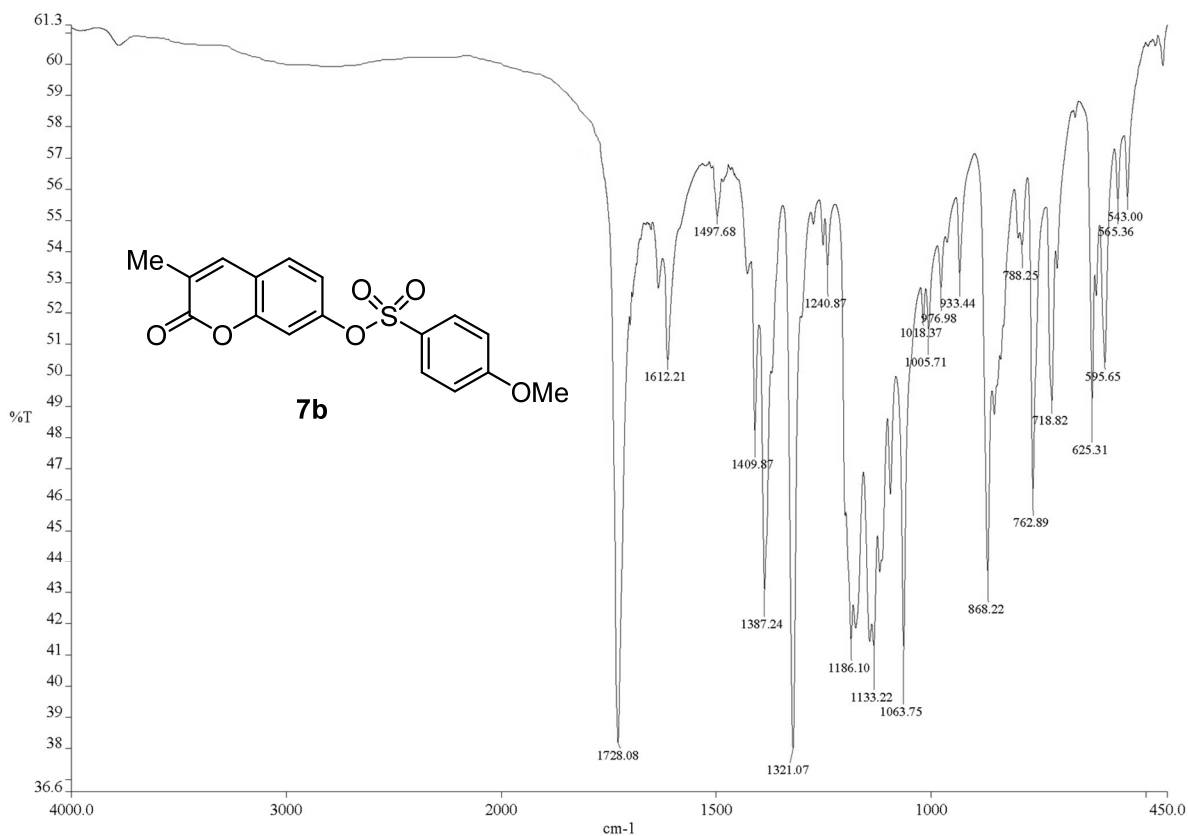

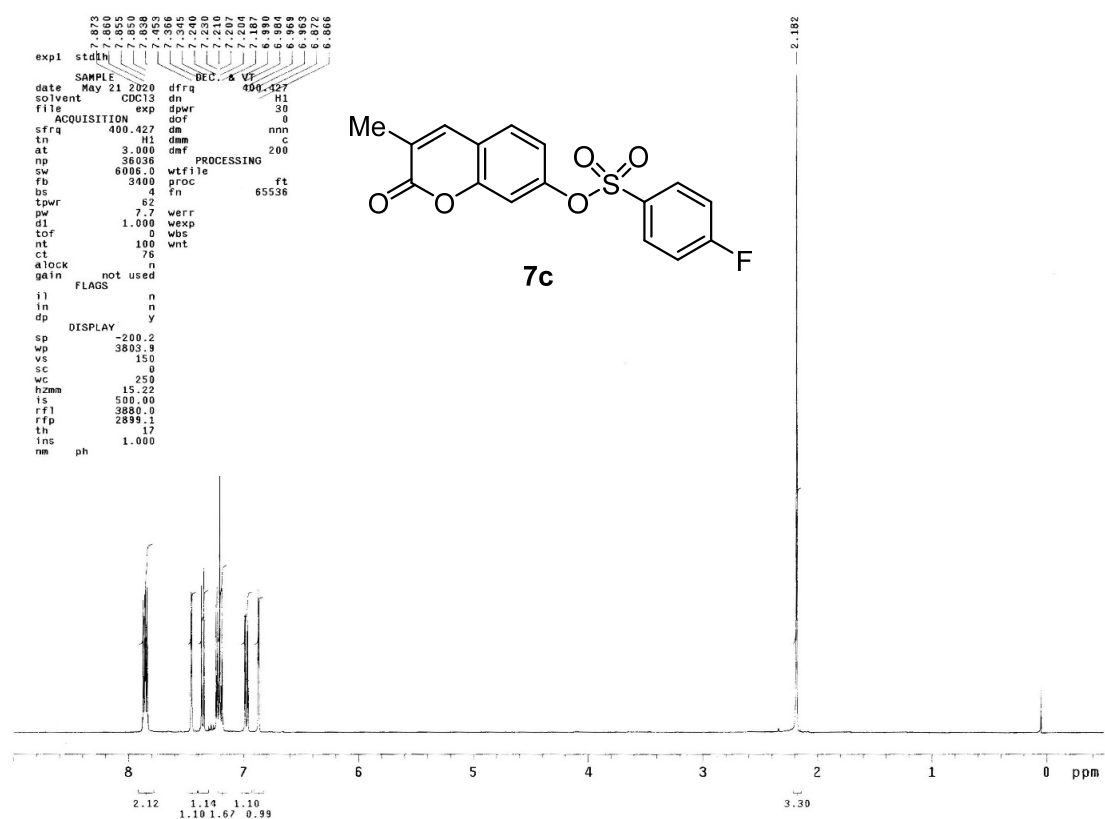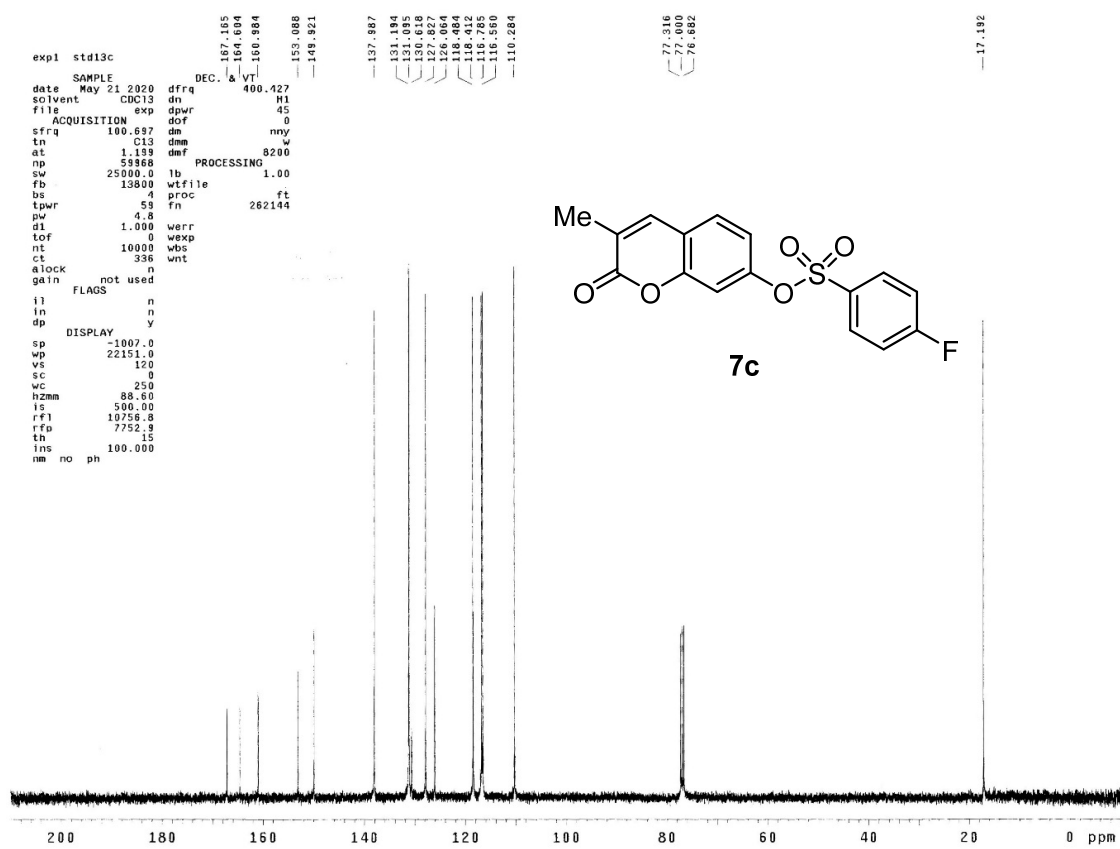

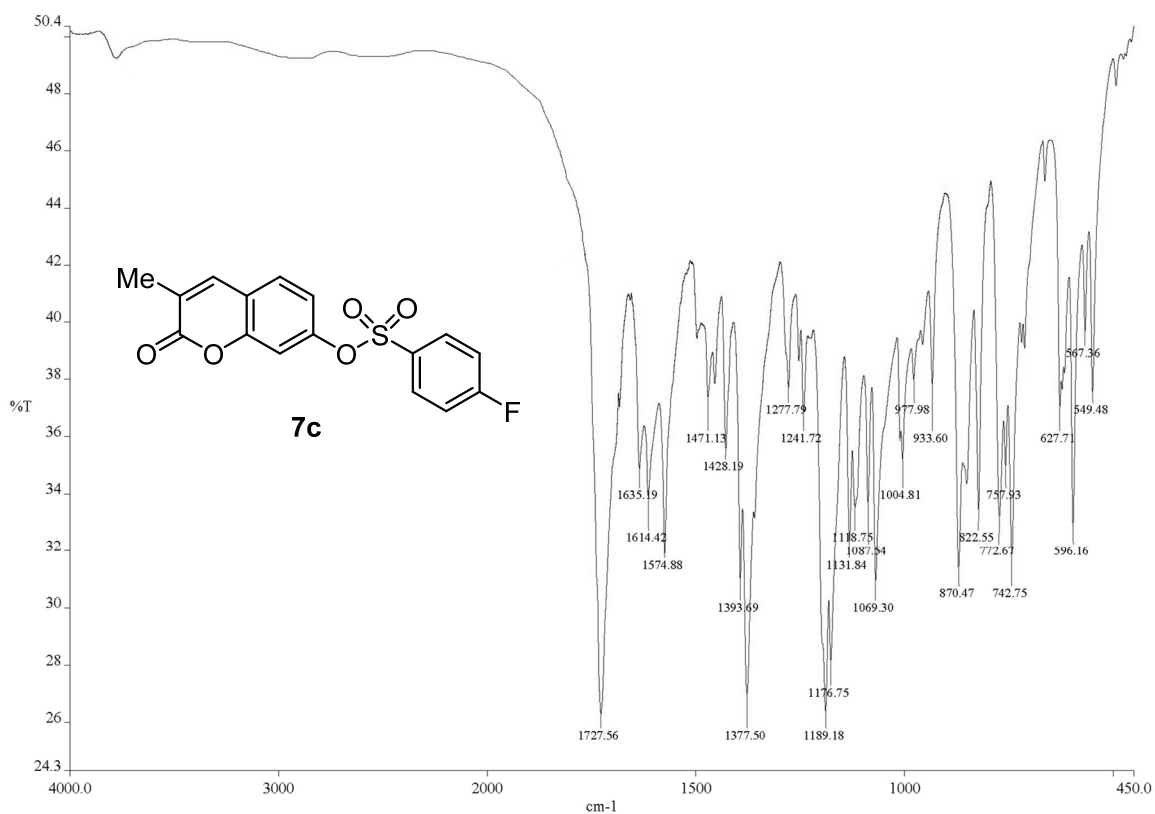

IR spectrum of compound 7c

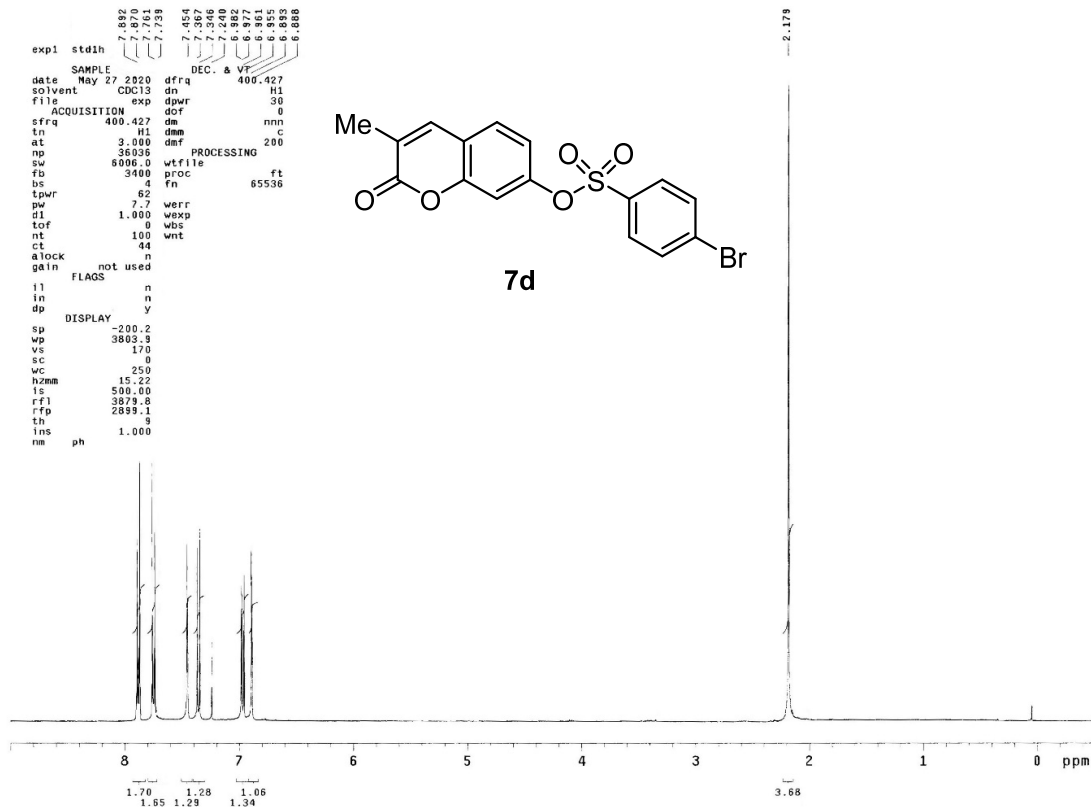

<sup>1</sup>H NMR spectrum of compound 7d

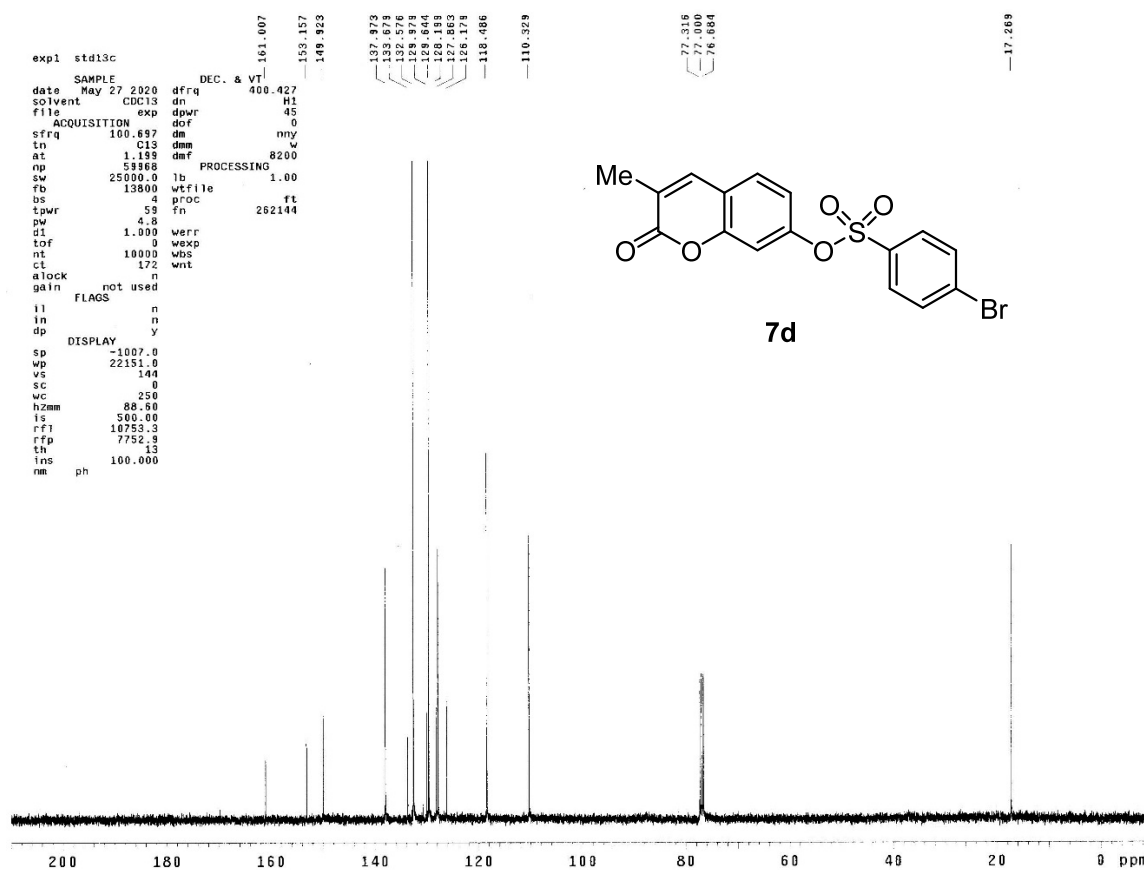

<sup>13</sup>C NMR spectrum of compound **7d**

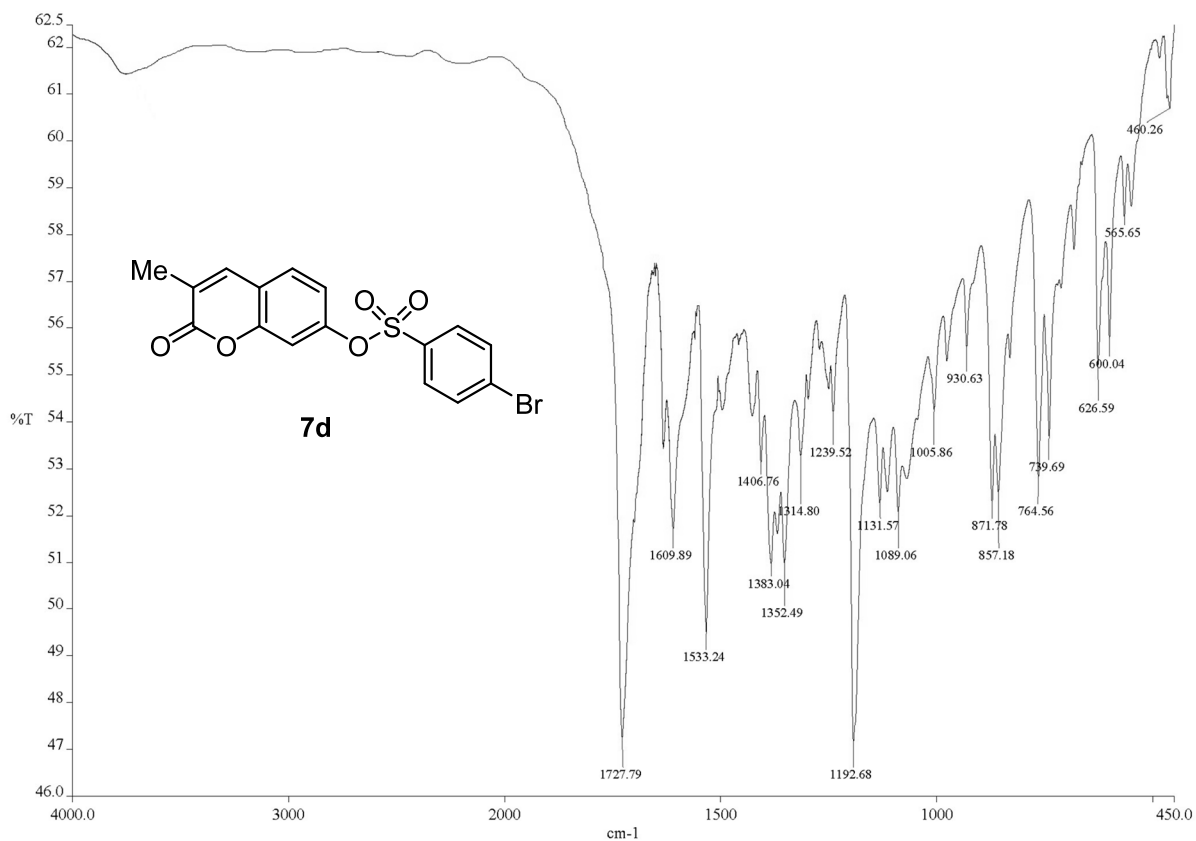

IR spectrum of compound **7d**

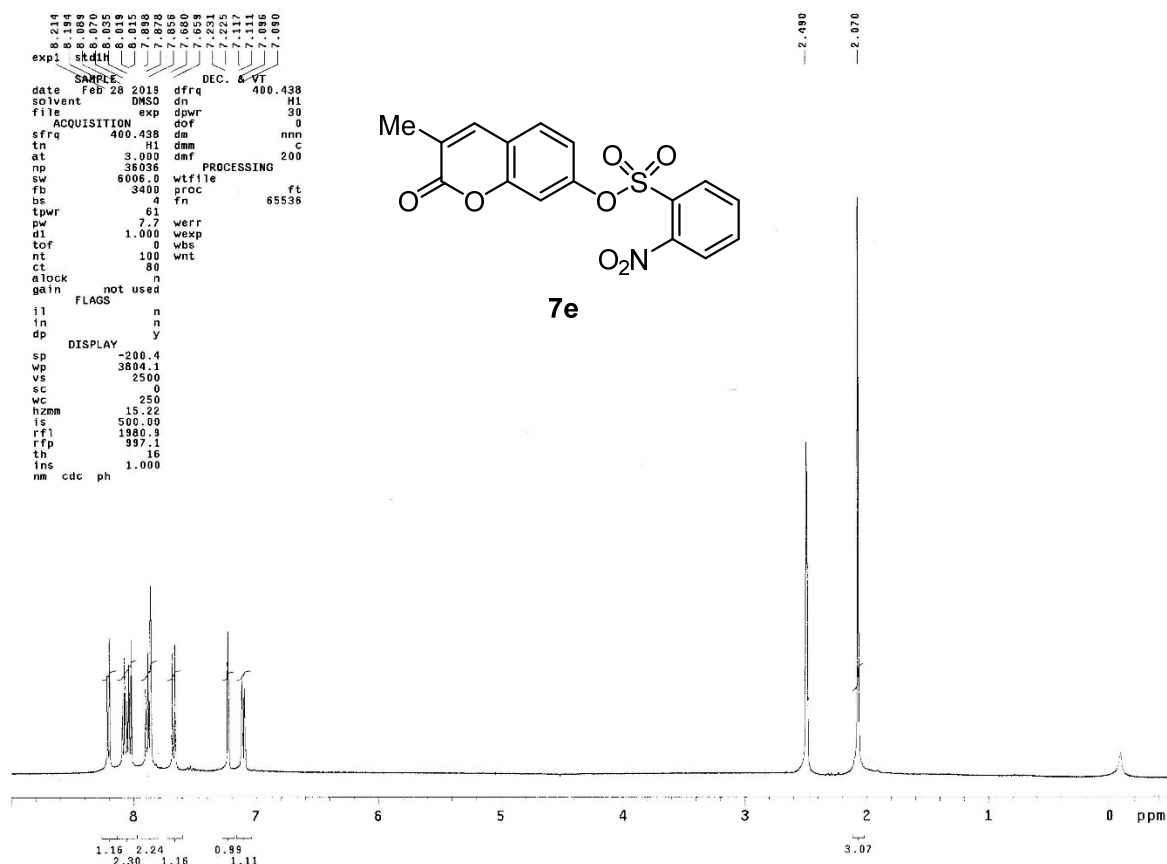

<sup>1</sup>H NMR spectrum of compound 7e

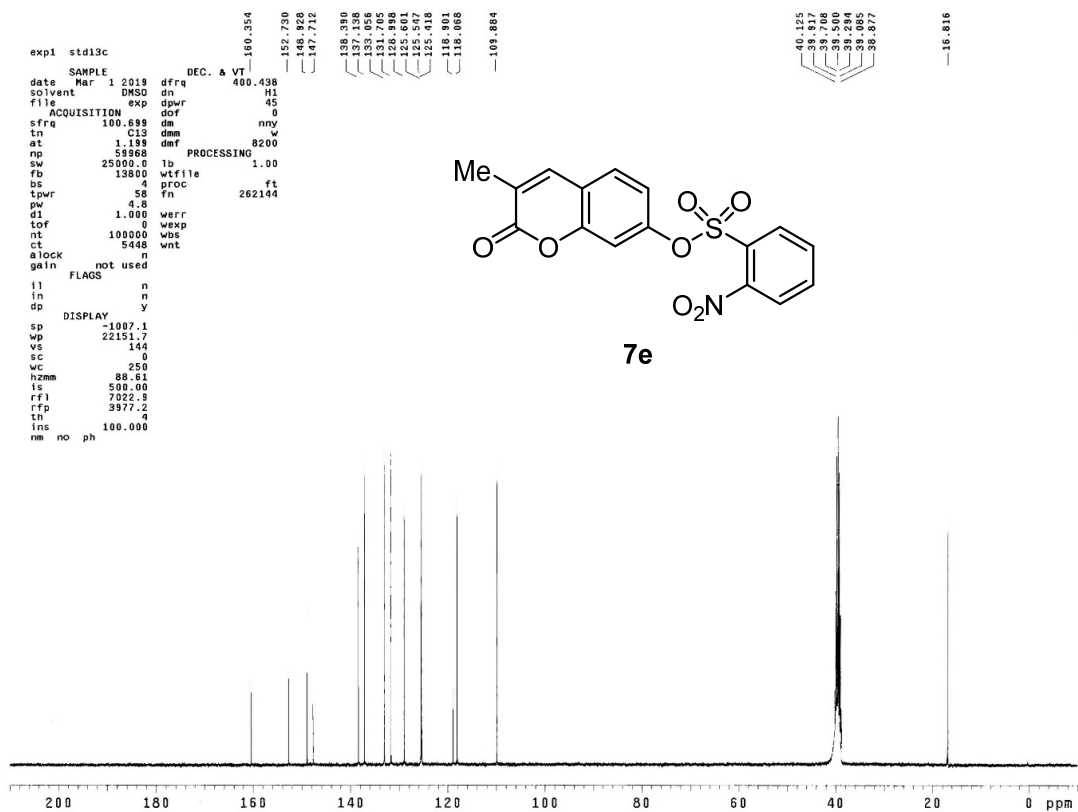

<sup>13</sup>C NMR spectrum of compound 7e



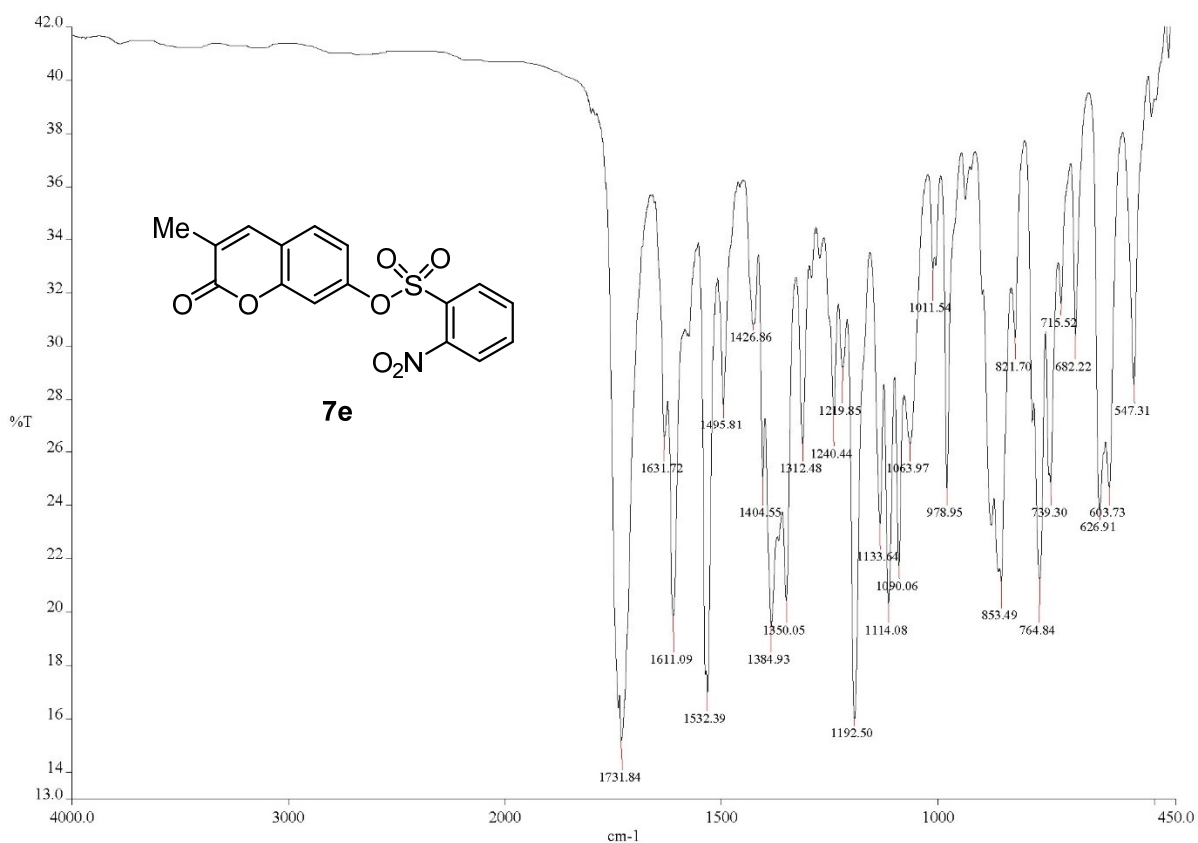

IR spectrum of compound **7e**

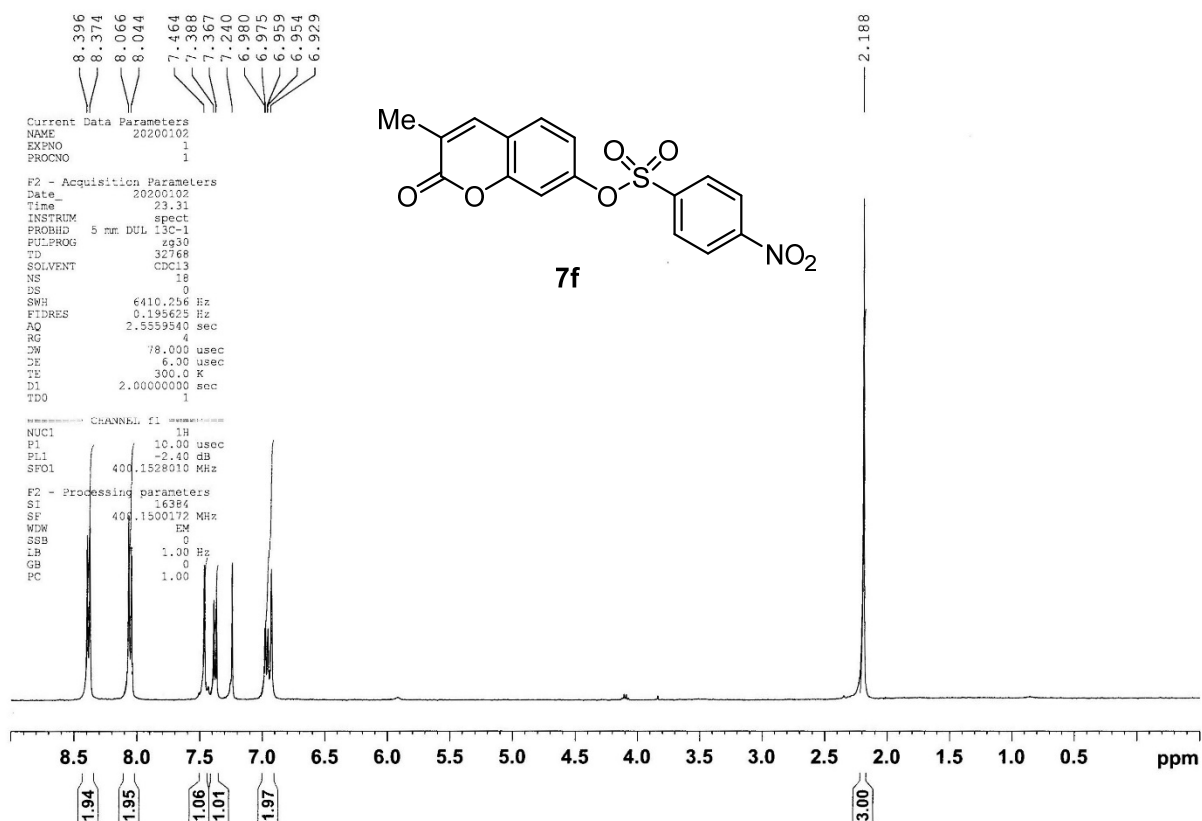

<sup>1</sup>H NMR spectrum of compound **7f**

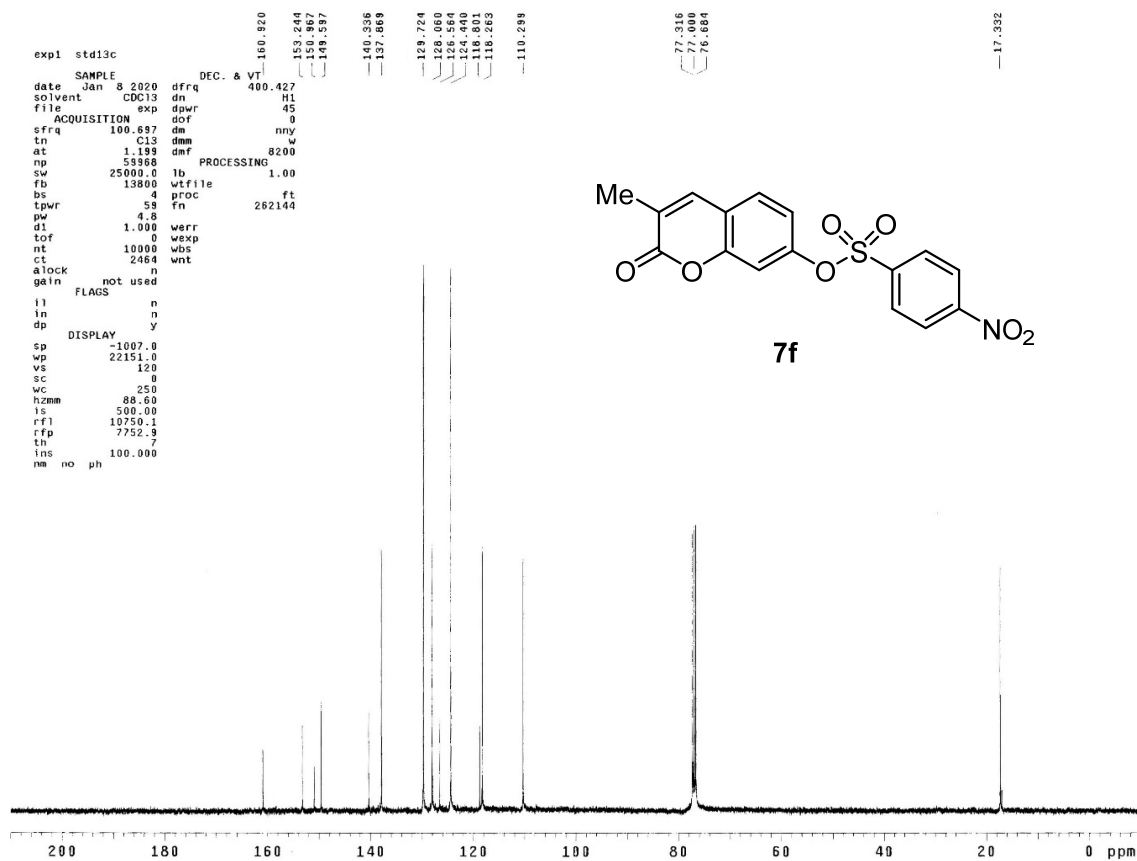

<sup>13</sup>C NMR spectrum of compound **7f**

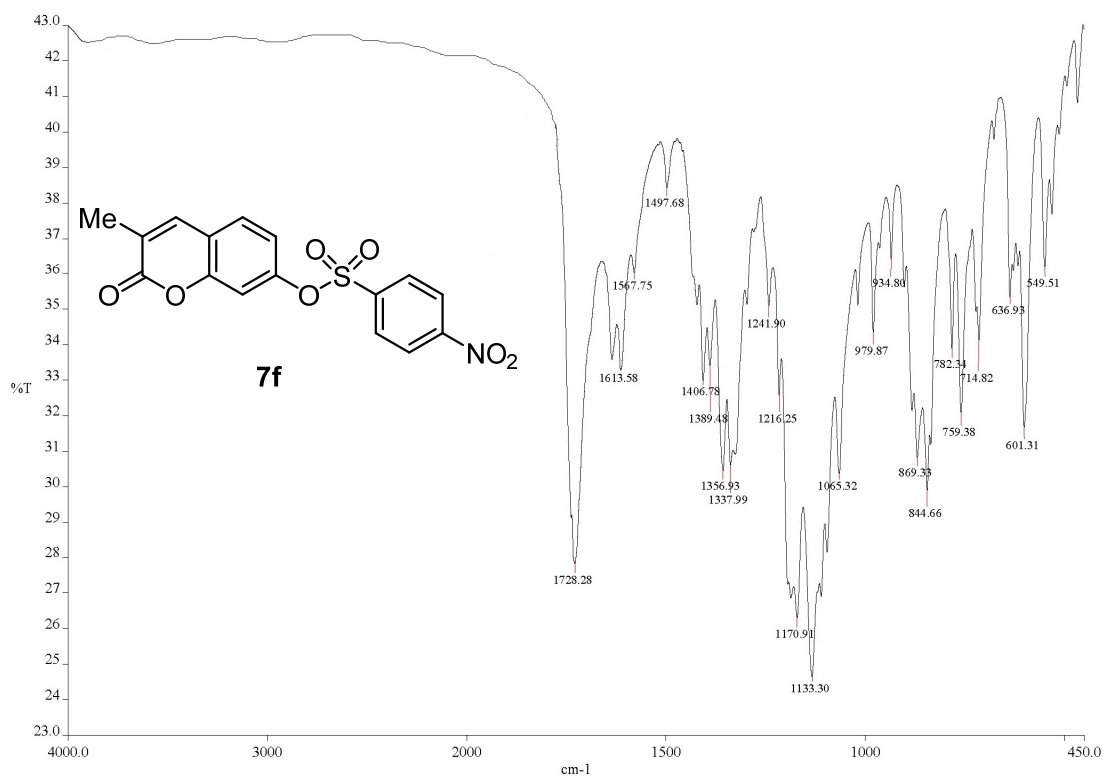

IR spectrum of compound **7f**

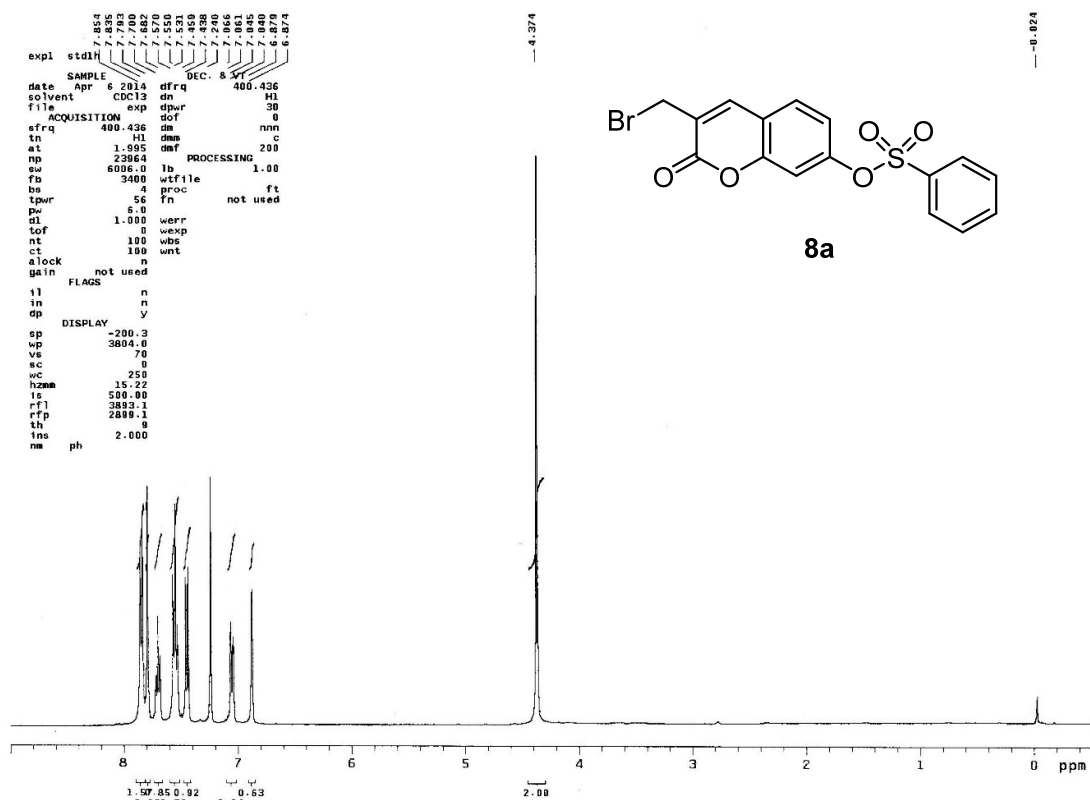

<sup>1</sup>H NMR spectrum of compound **8a**

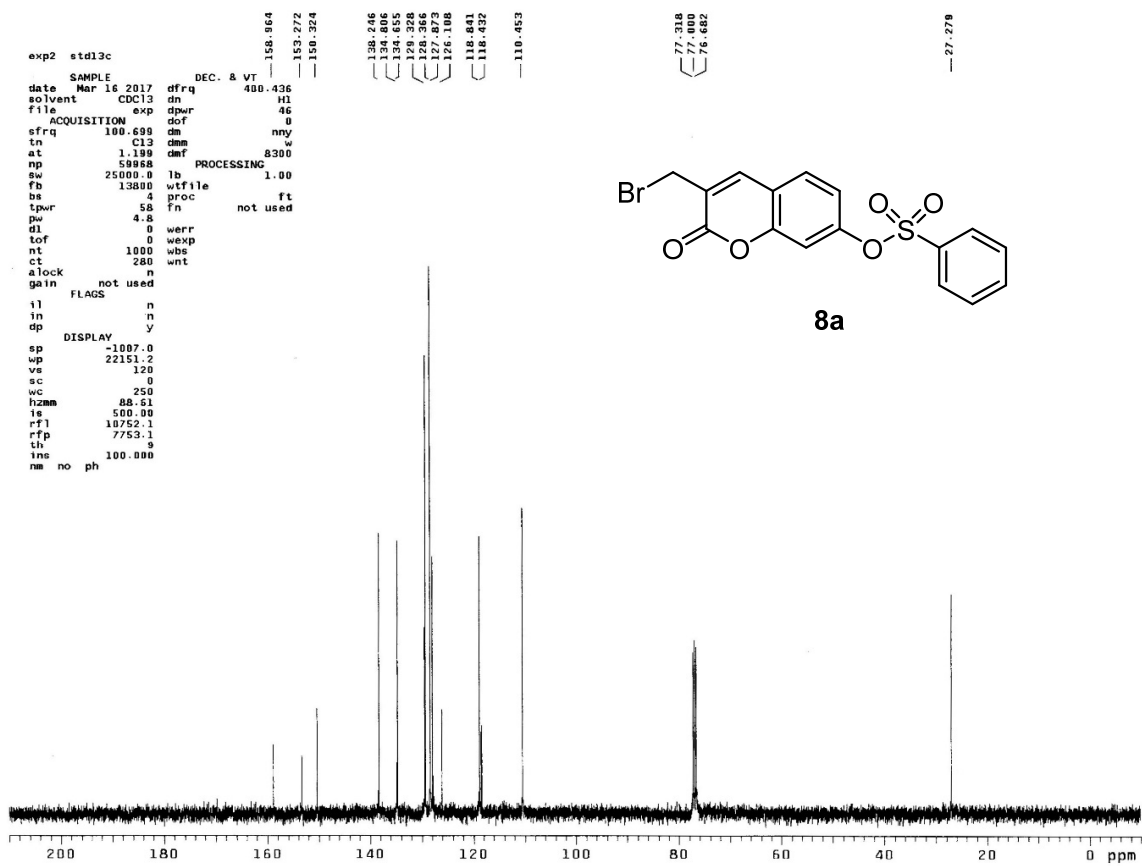

<sup>13</sup>C NMR spectrum of compound **8a**

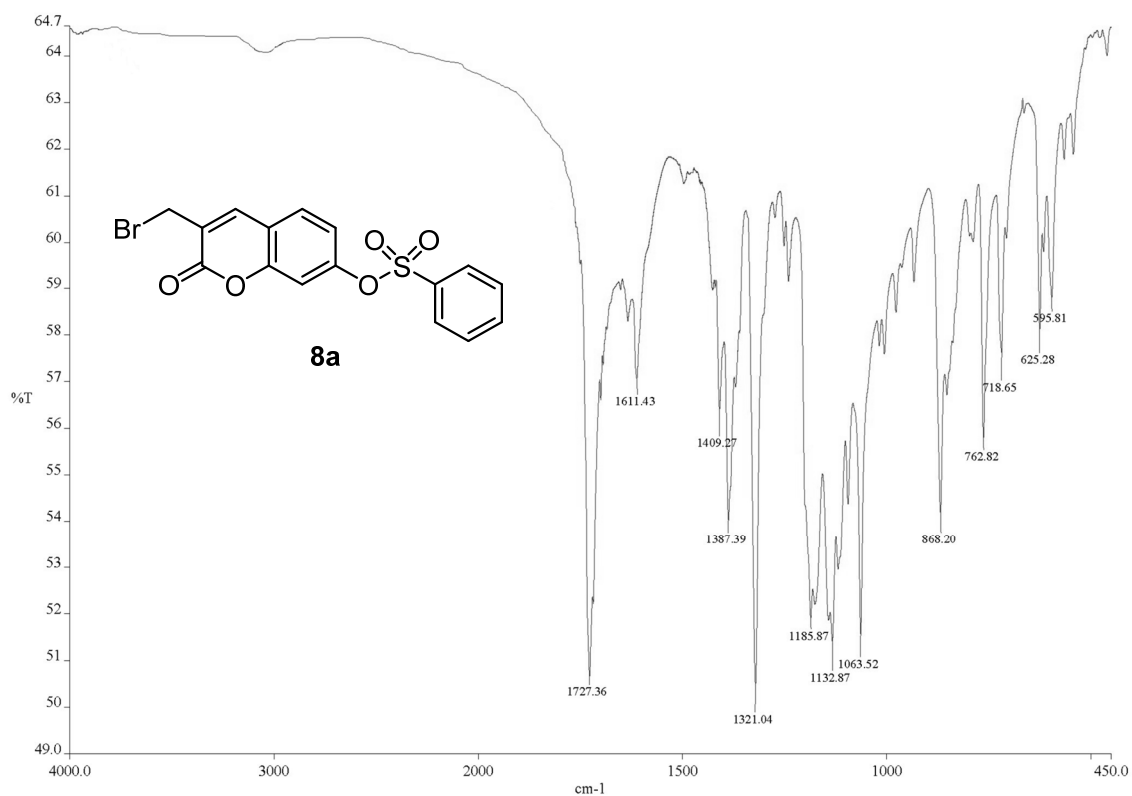

IR spectrum of compound **8a**

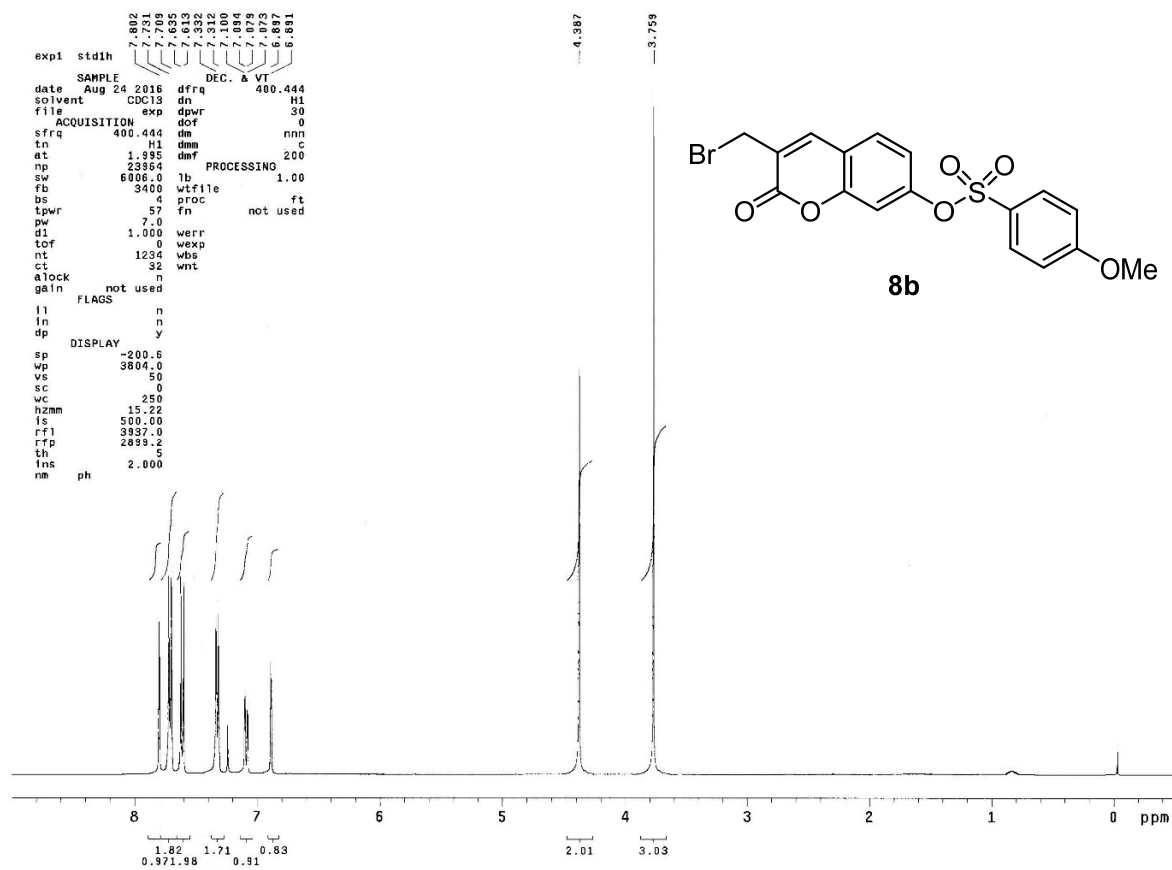

<sup>1</sup>H NMR spectrum of compound **8b**

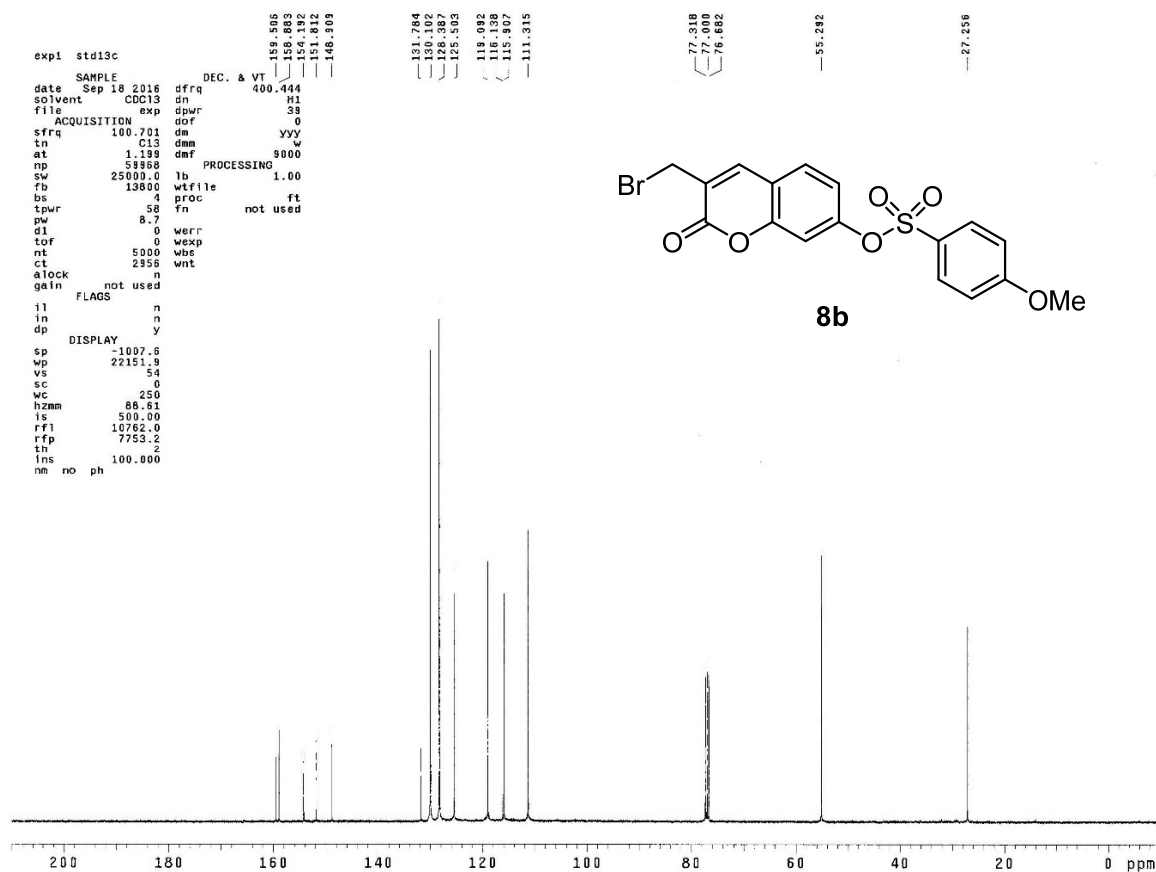

<sup>13</sup>C NMR spectrum of compound **8b**

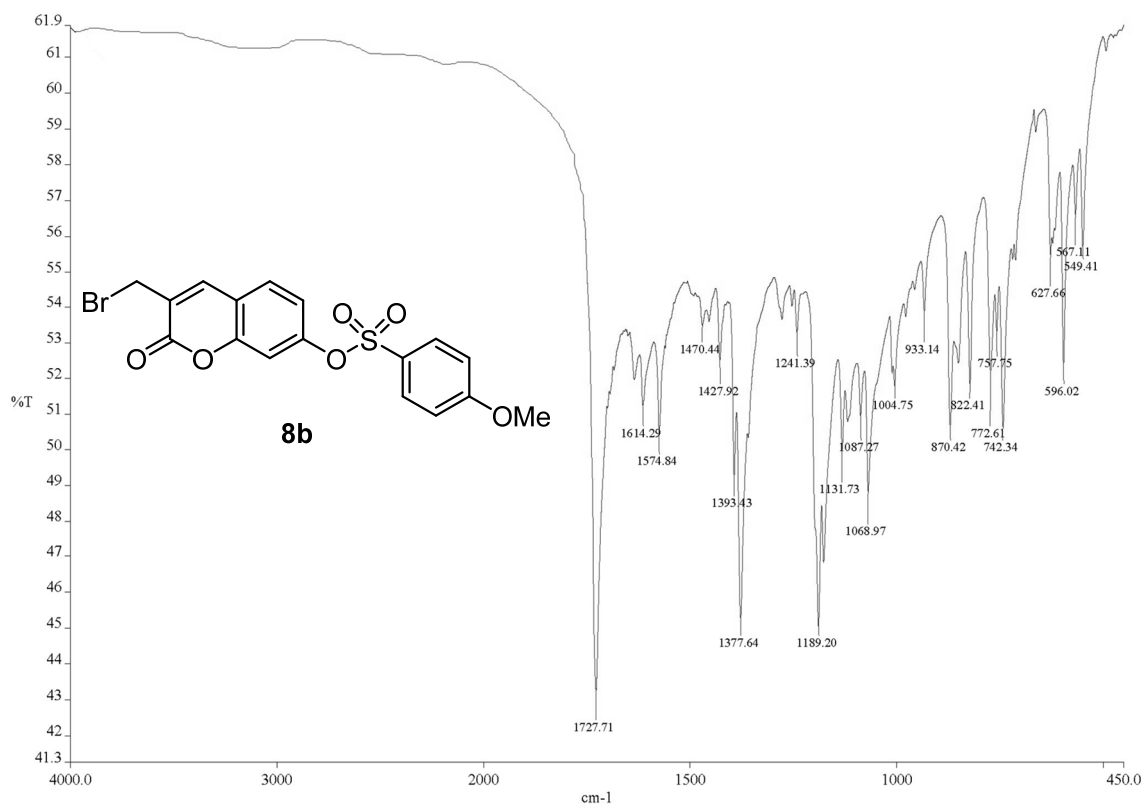

IR spectrum of compound **8b**

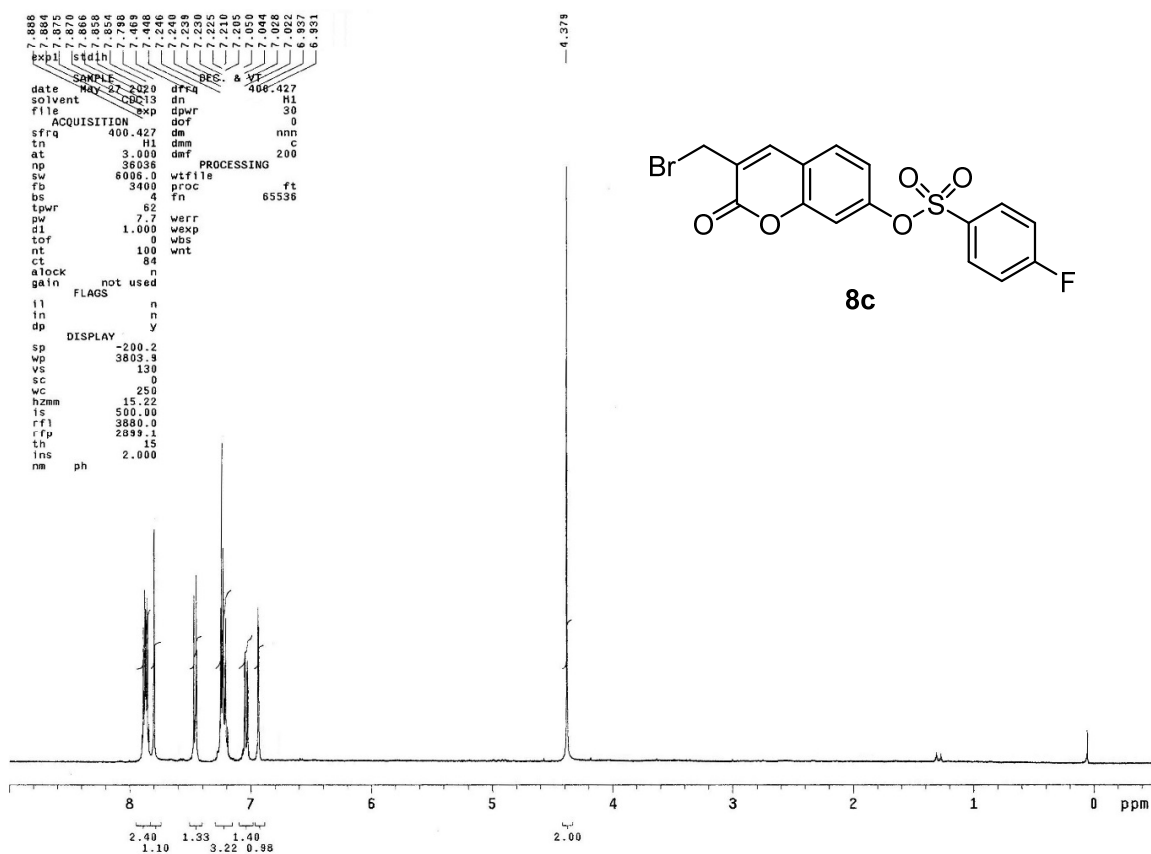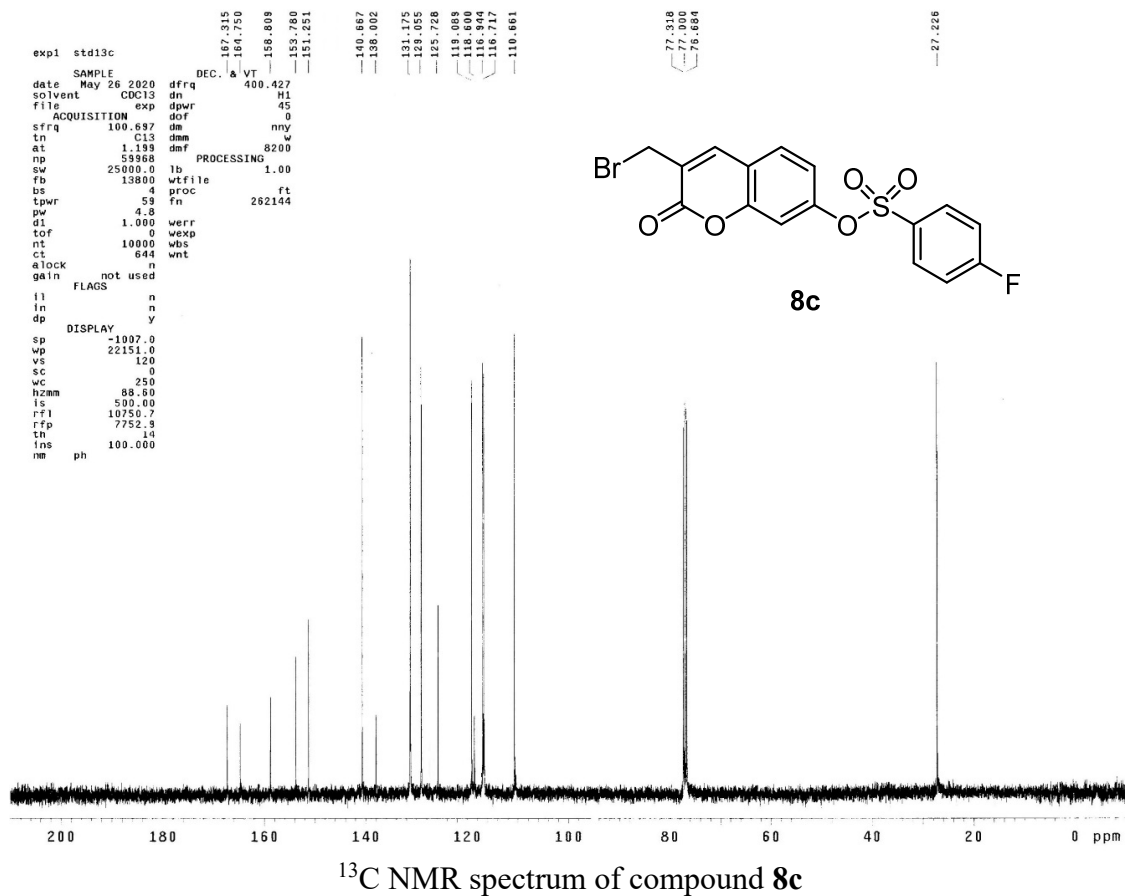

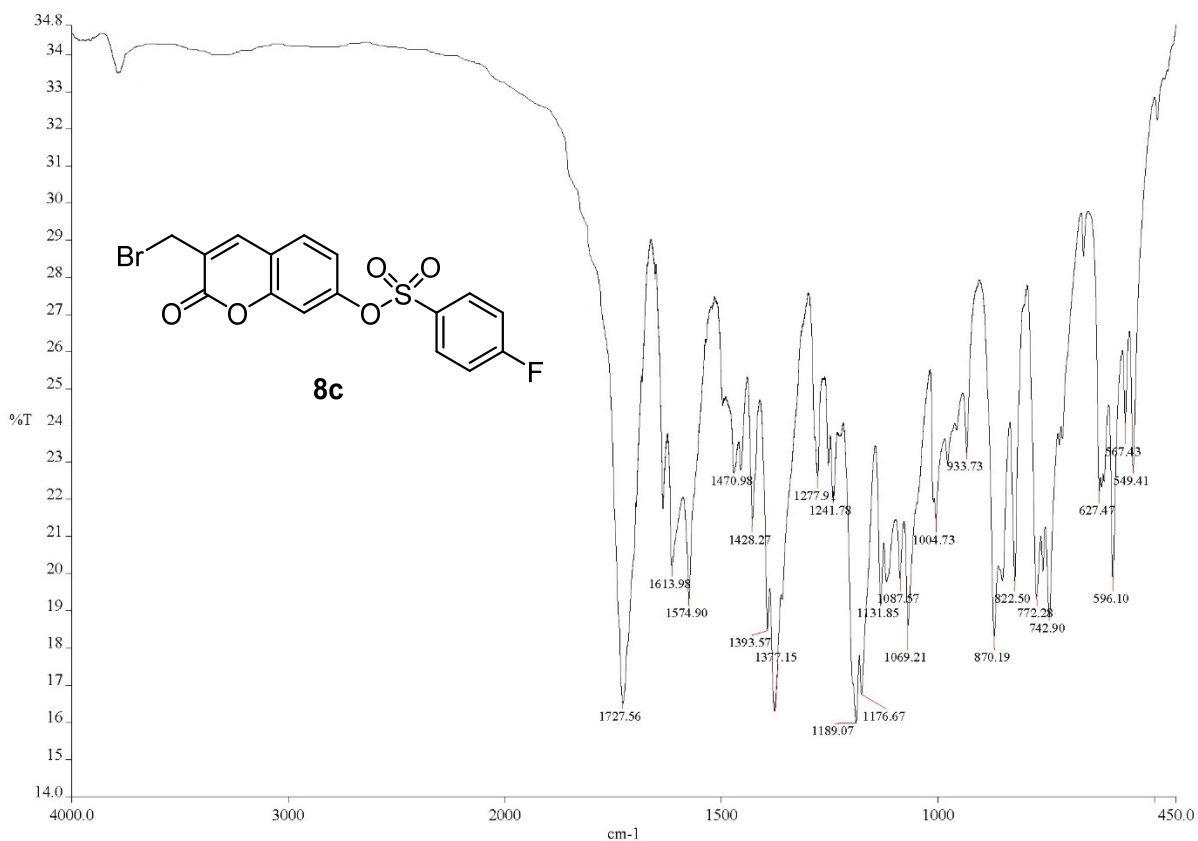

IR spectrum of compound **8c**

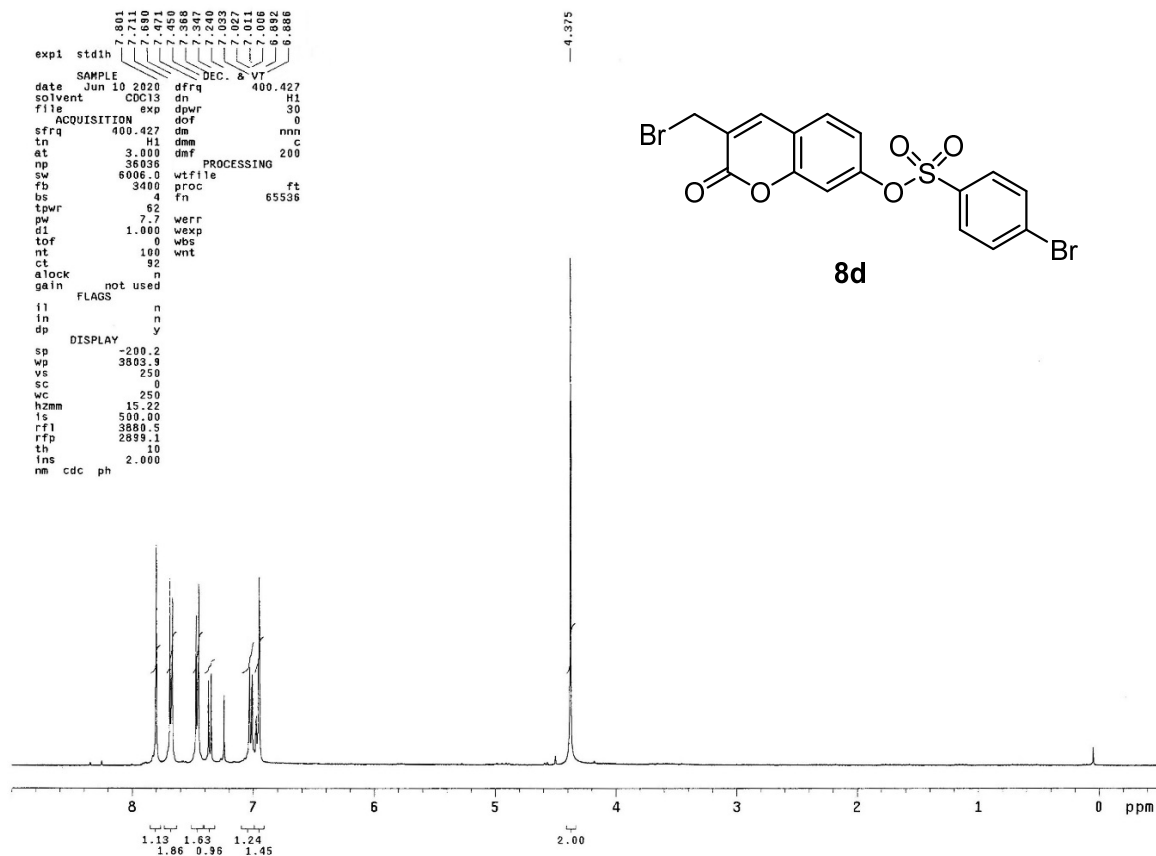

<sup>1</sup>H NMR spectrum of compound **8d**

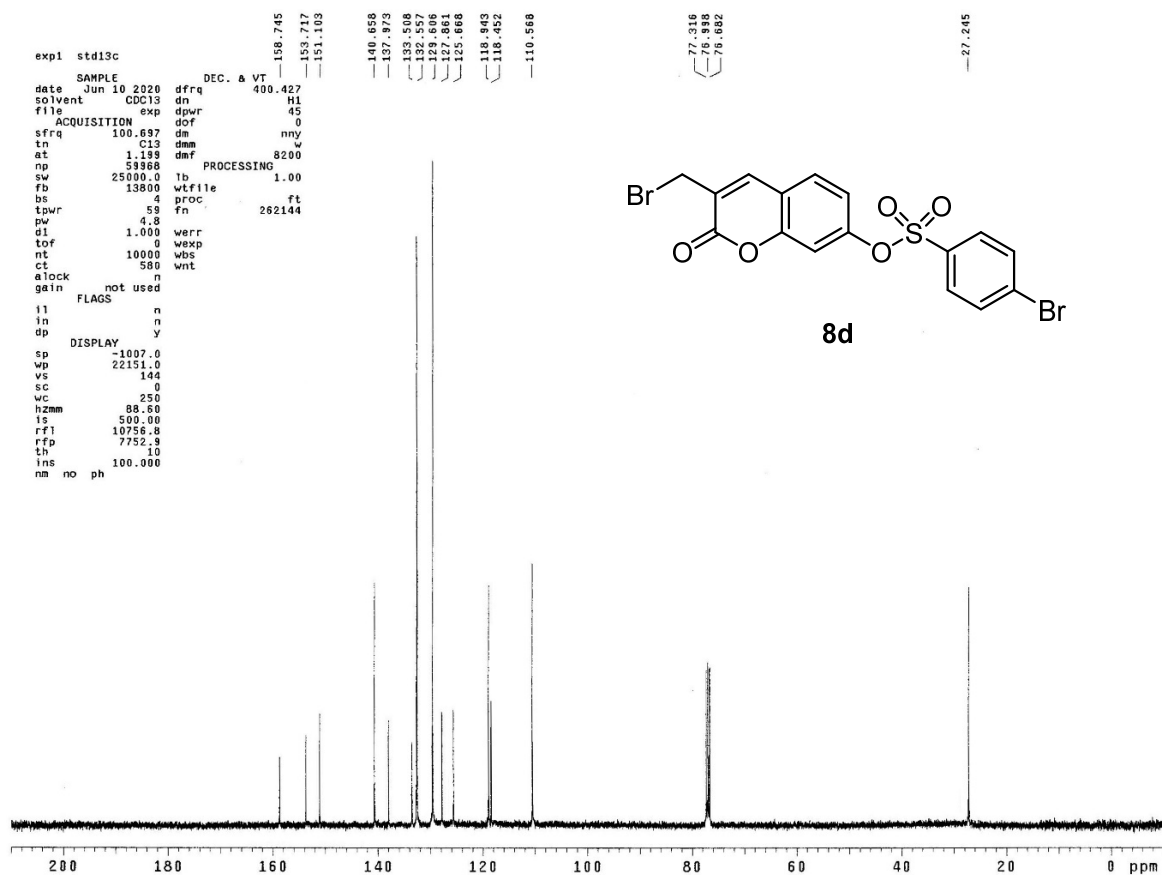

$^{13}\text{C}$  NMR spectrum of compound **8d**

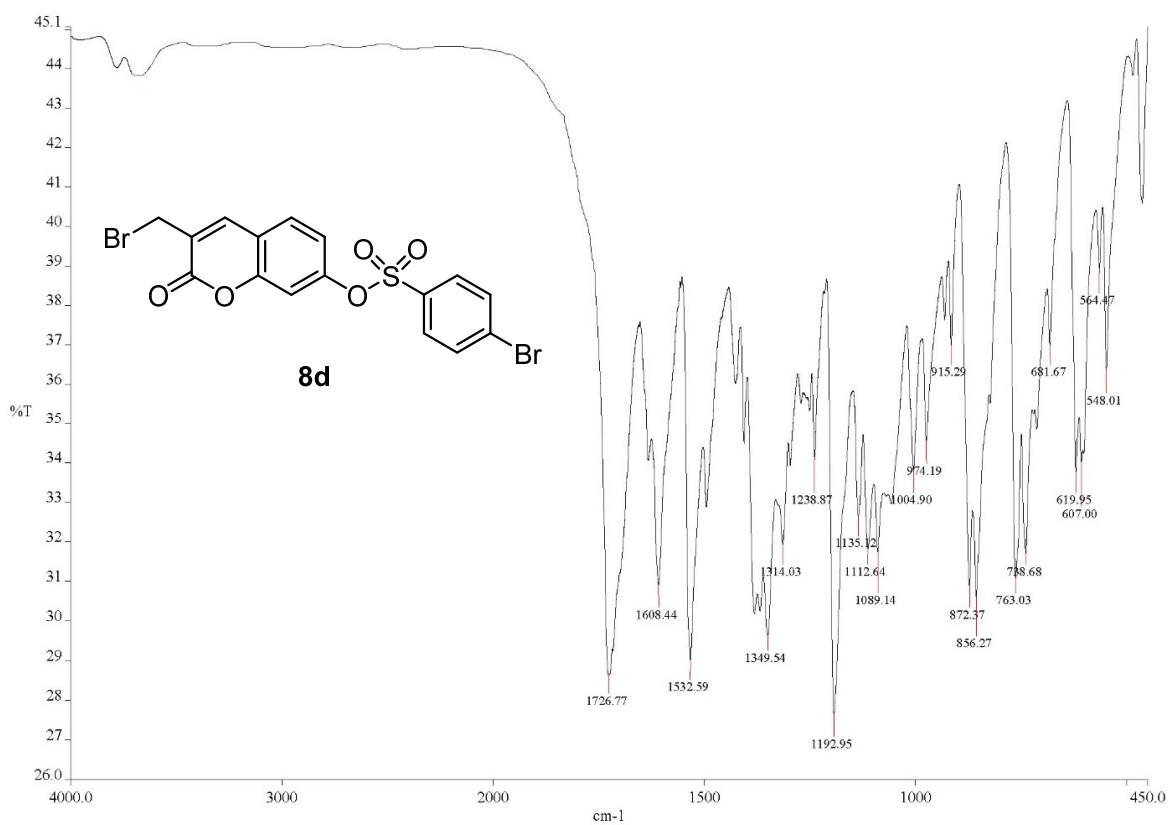

IR spectrum of compound **8d**



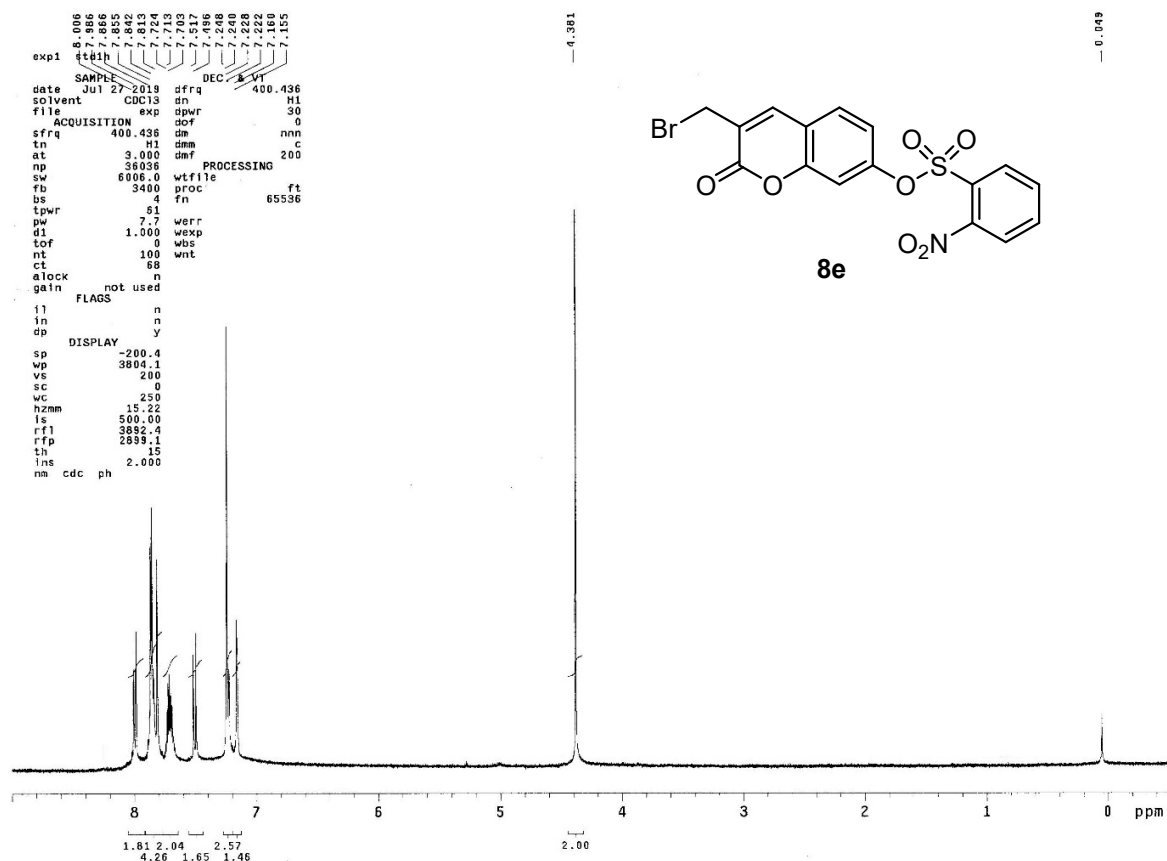

<sup>1</sup>H NMR spectrum of compound 8e

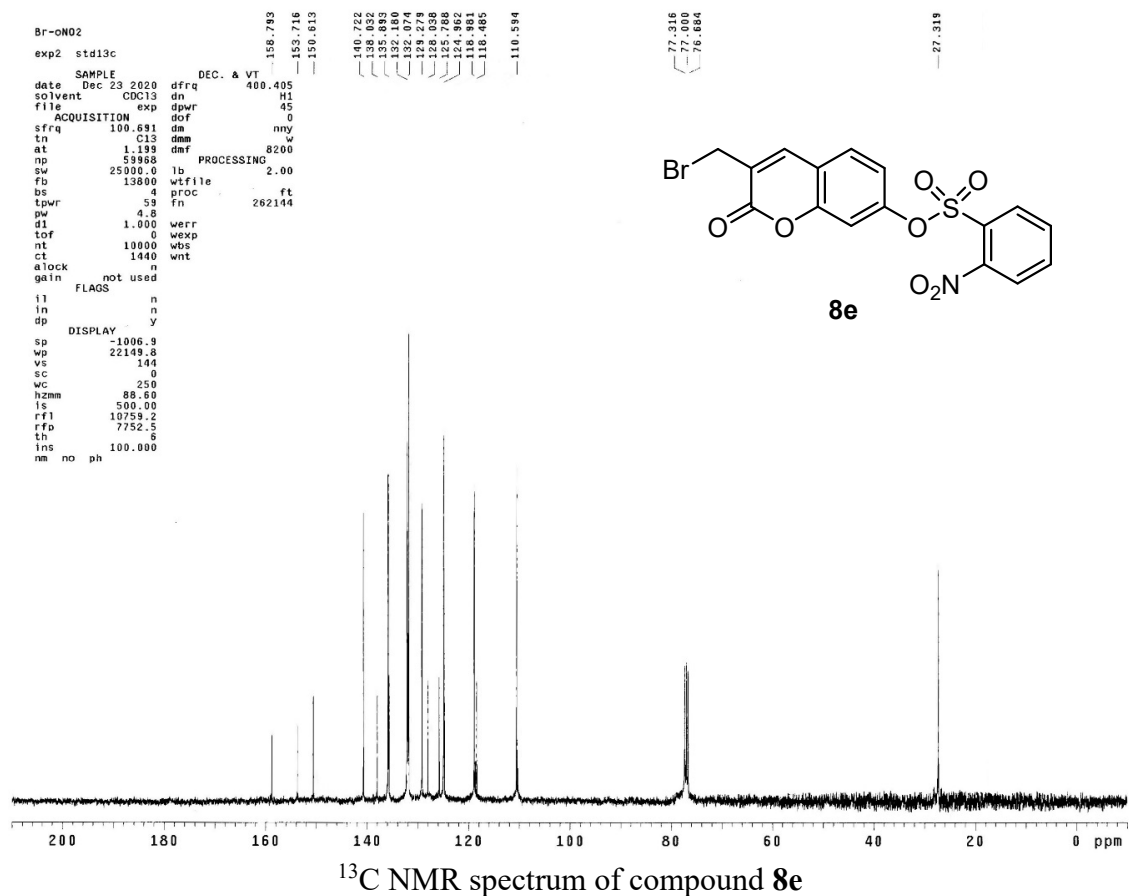

<sup>13</sup>C NMR spectrum of compound 8e

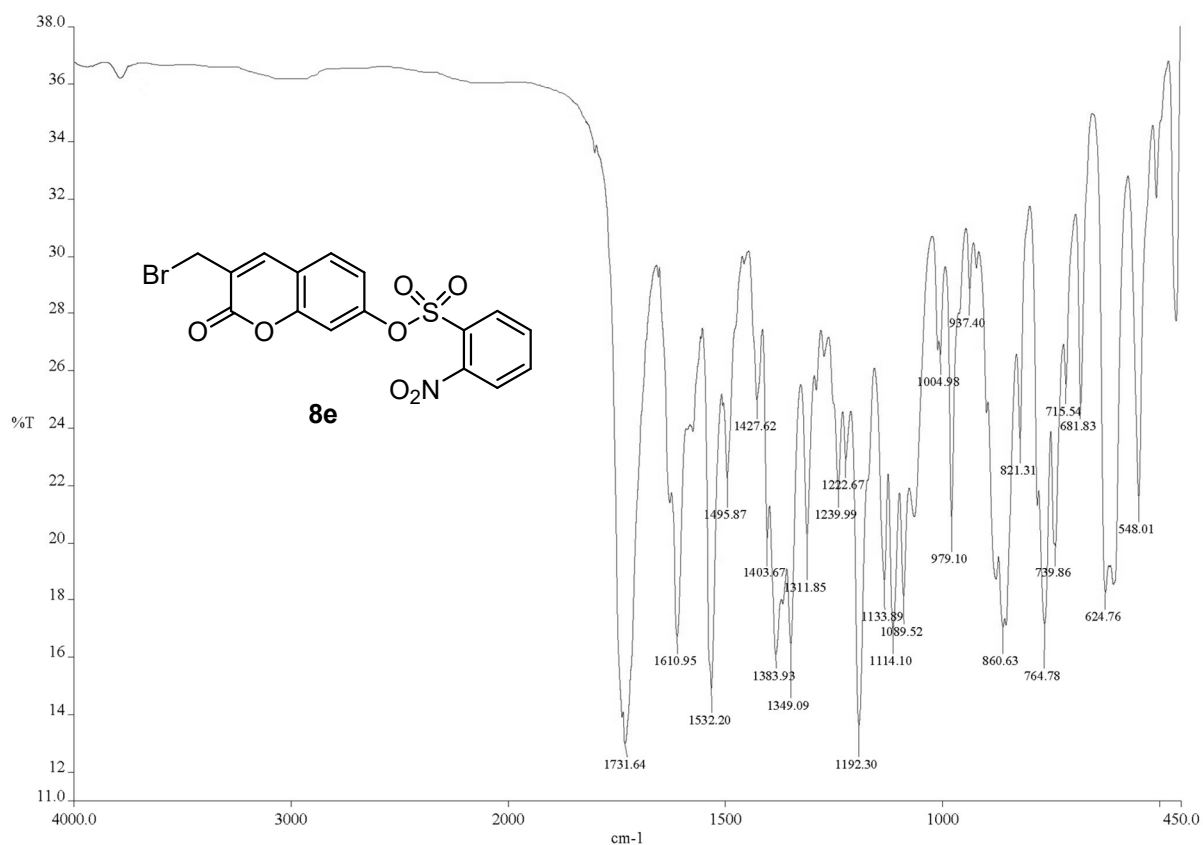

IR spectrum of compound **8e**

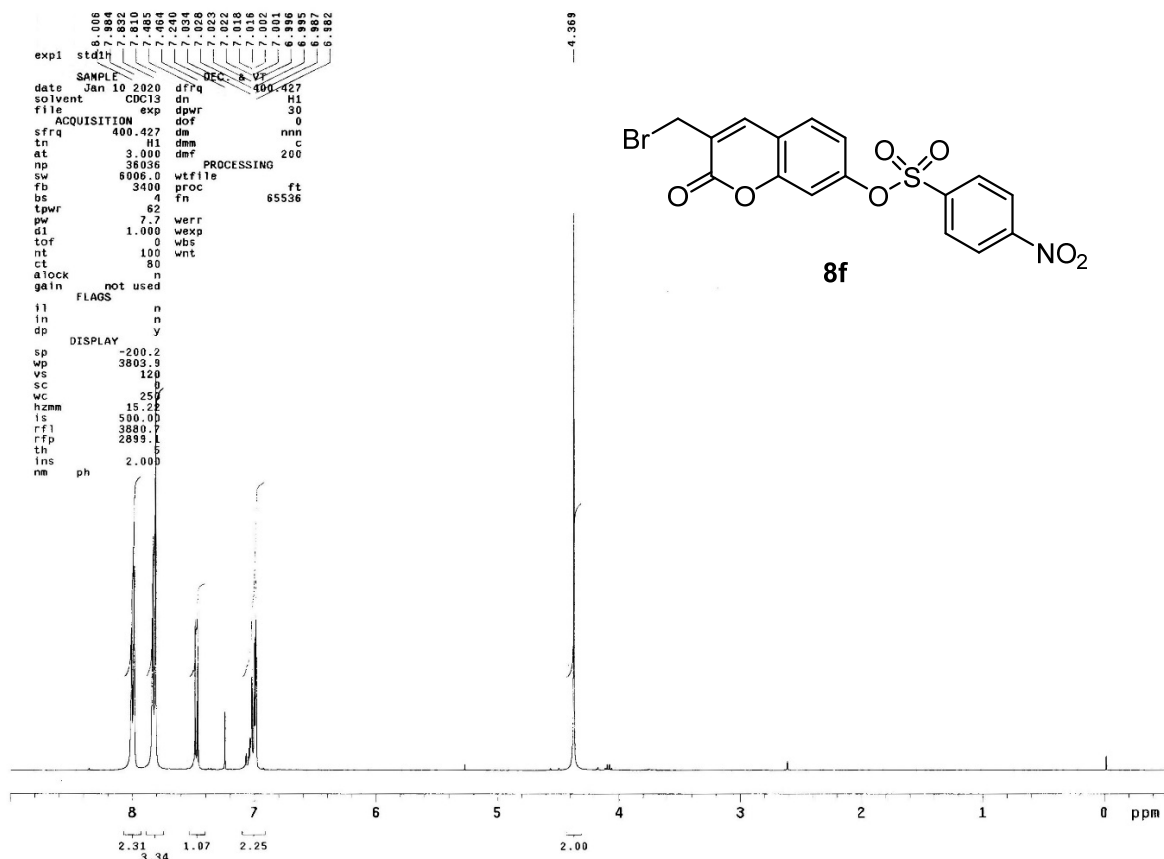

<sup>1</sup>H NMR spectrum of compound **8f**

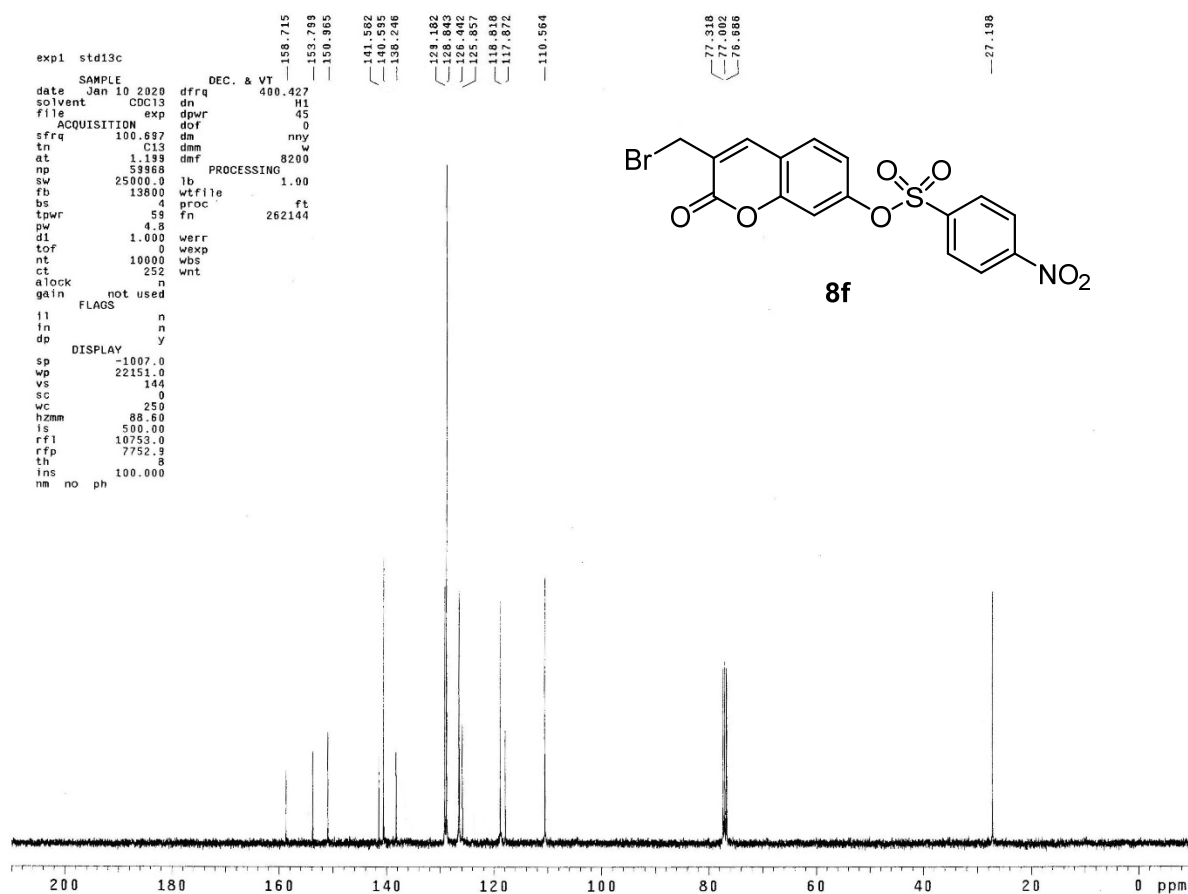

<sup>13</sup>C NMR spectrum of compound **8f**

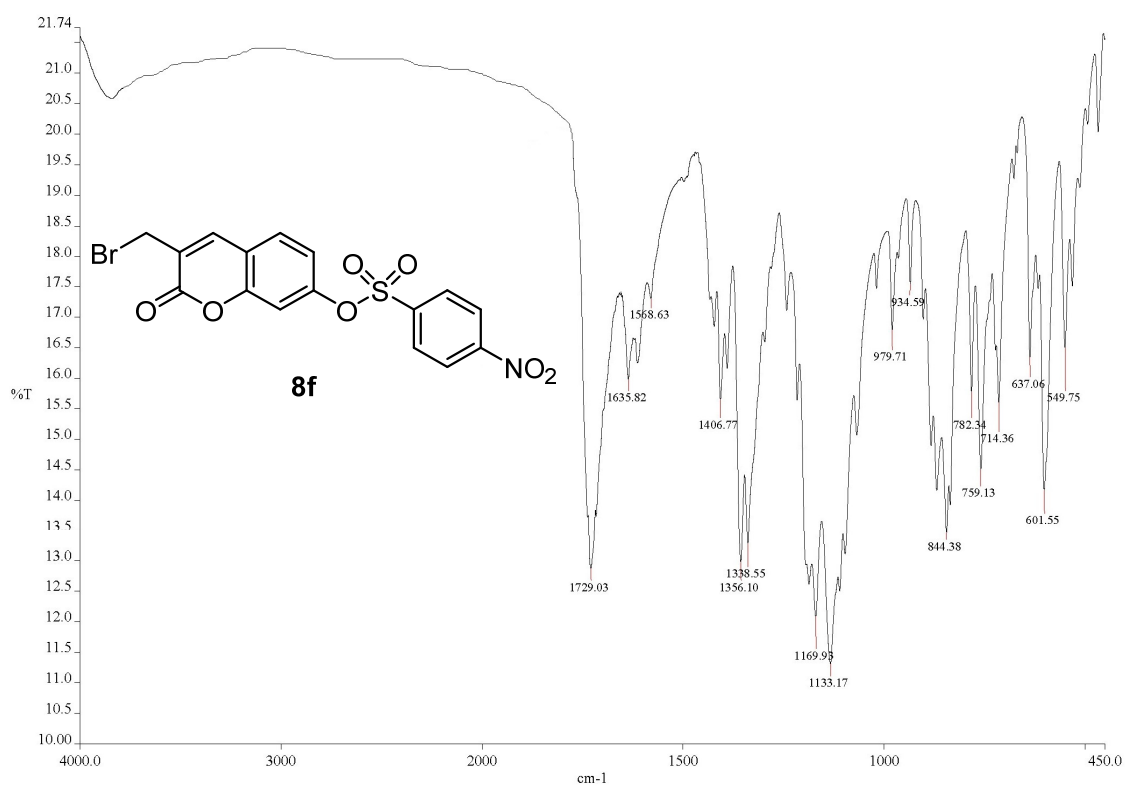

IR spectrum of compound **8f**

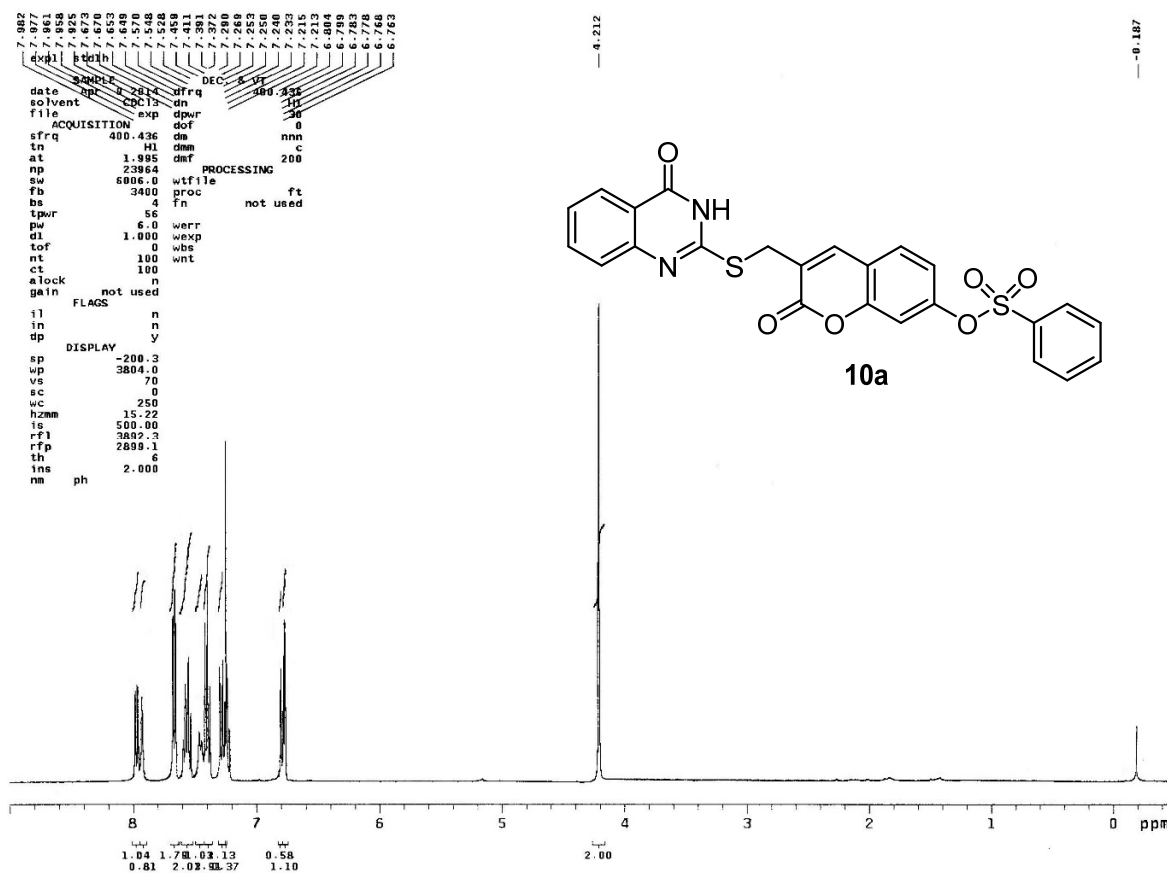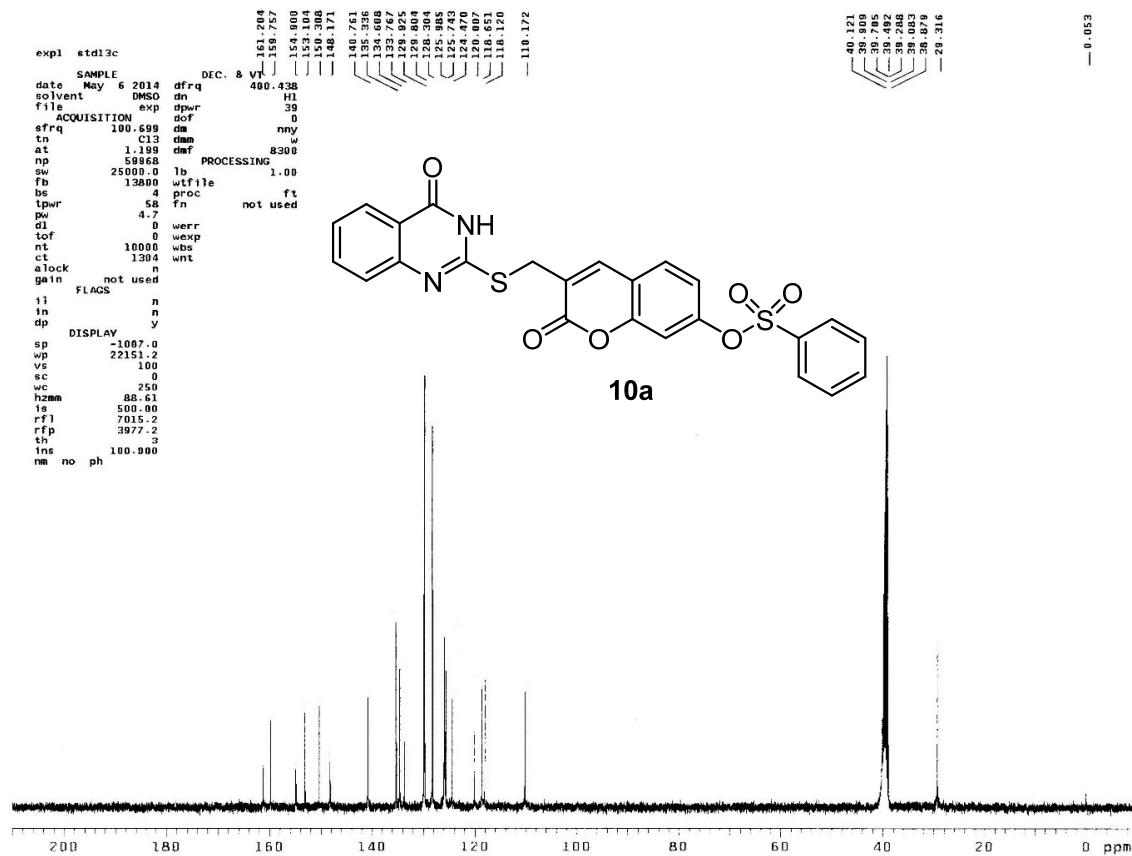

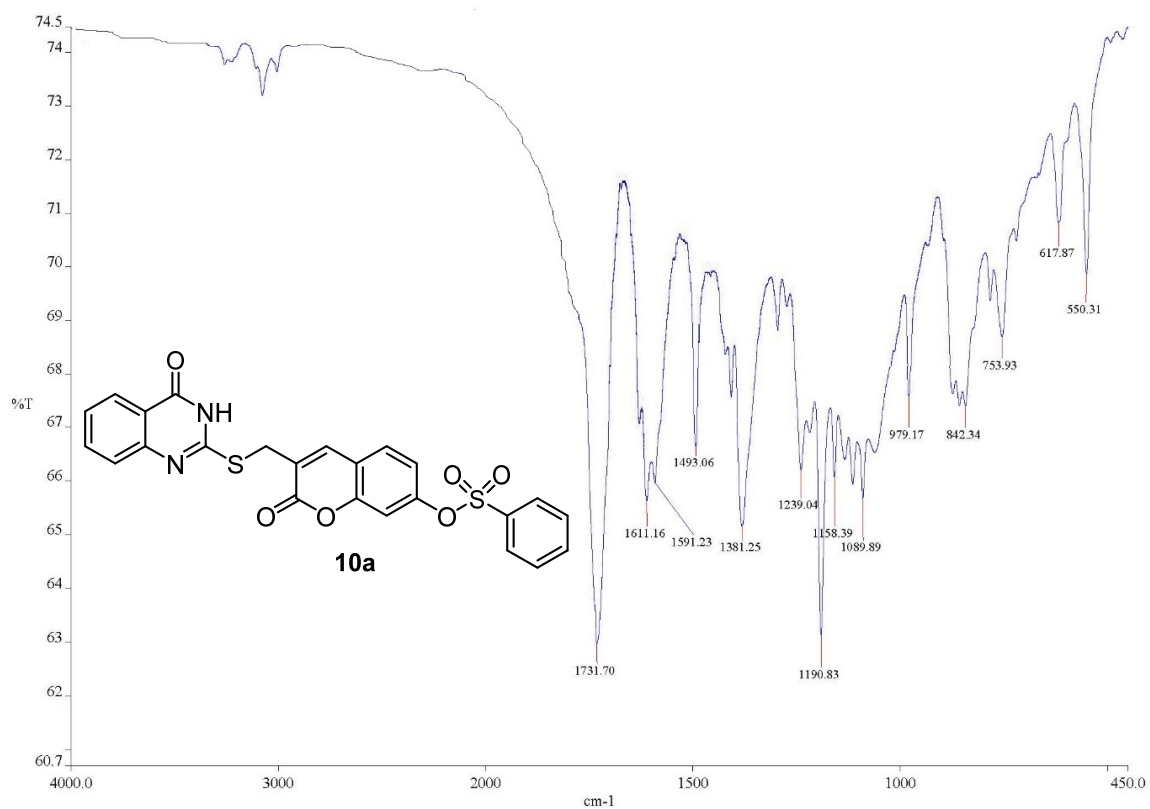

IR spectrum of compound **10a**

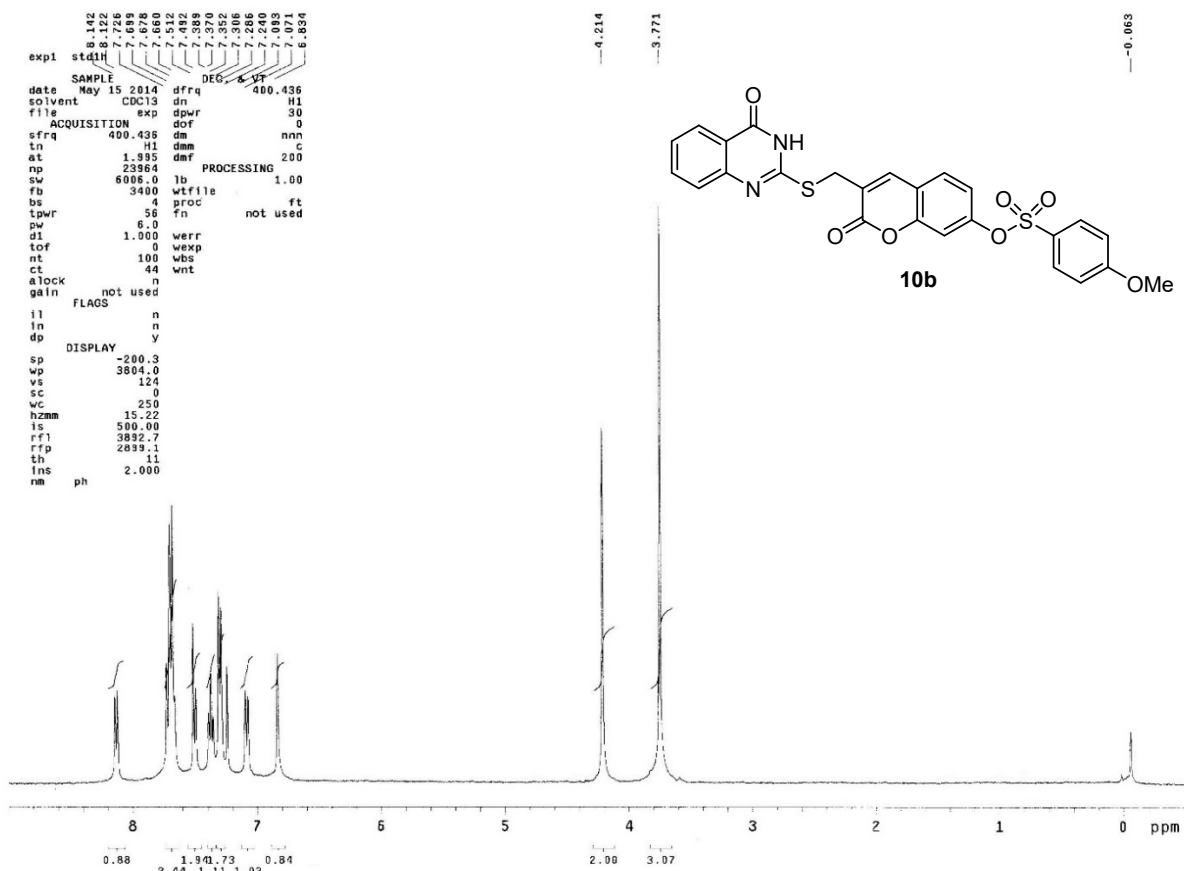

<sup>1</sup>H NMR spectrum of compound **10b**

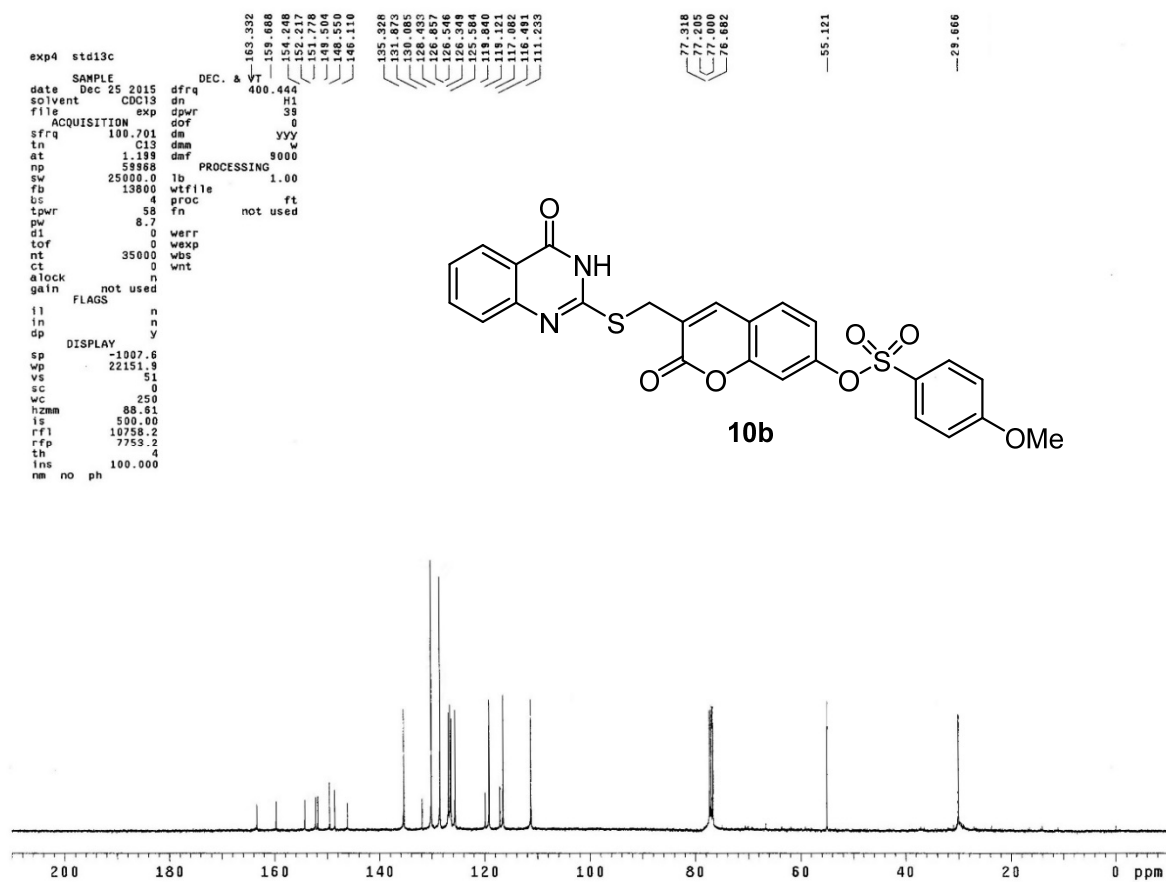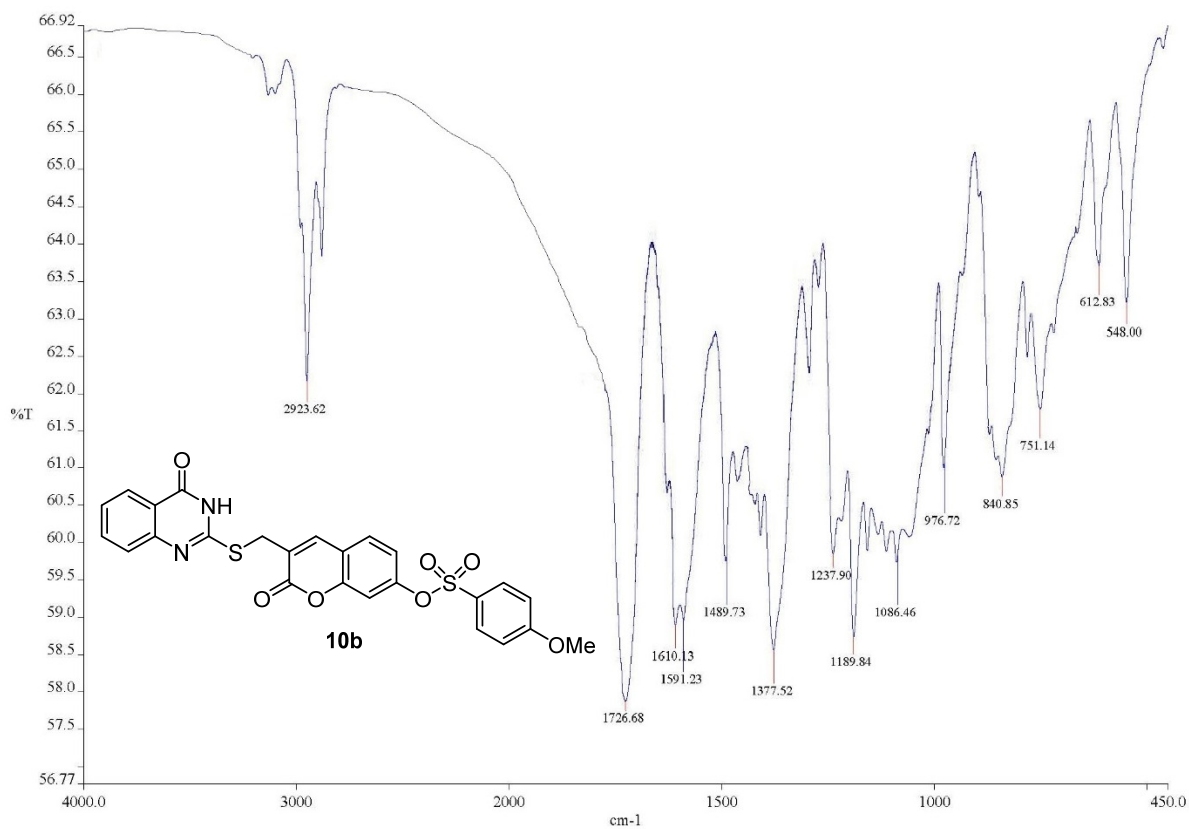

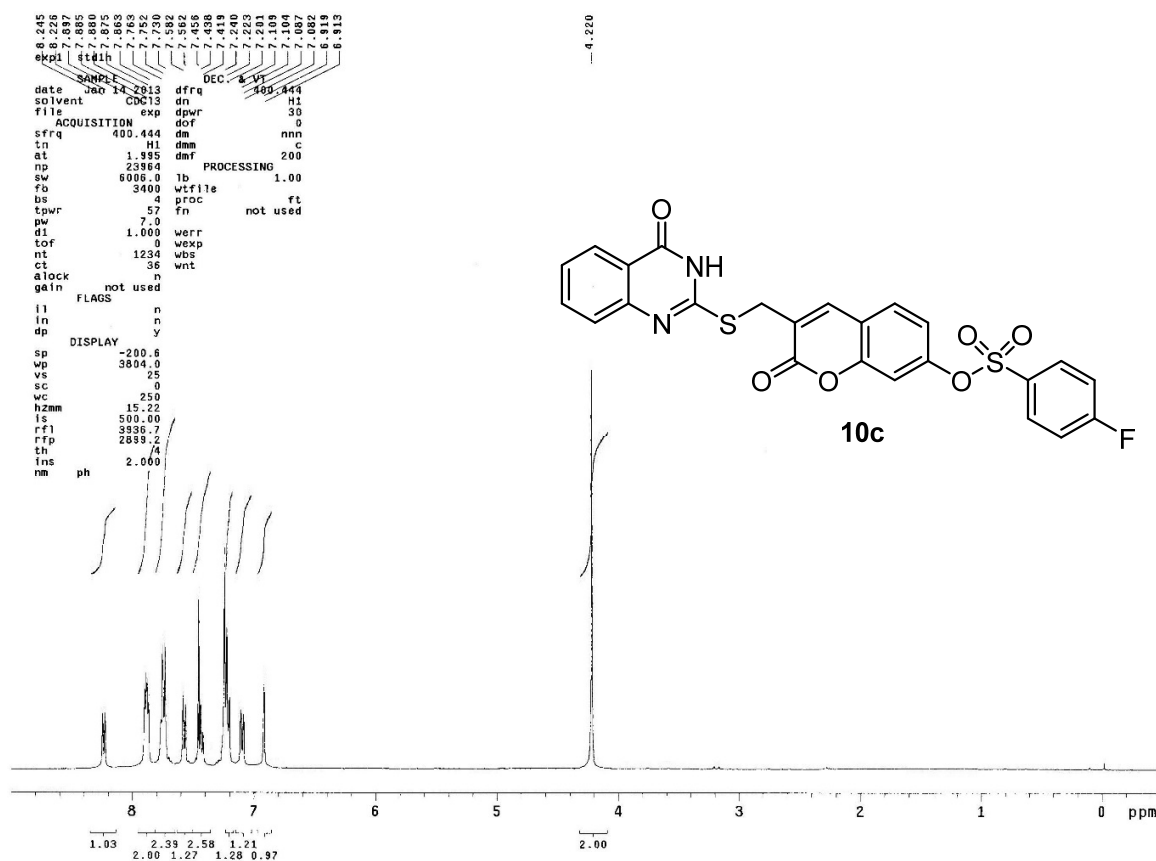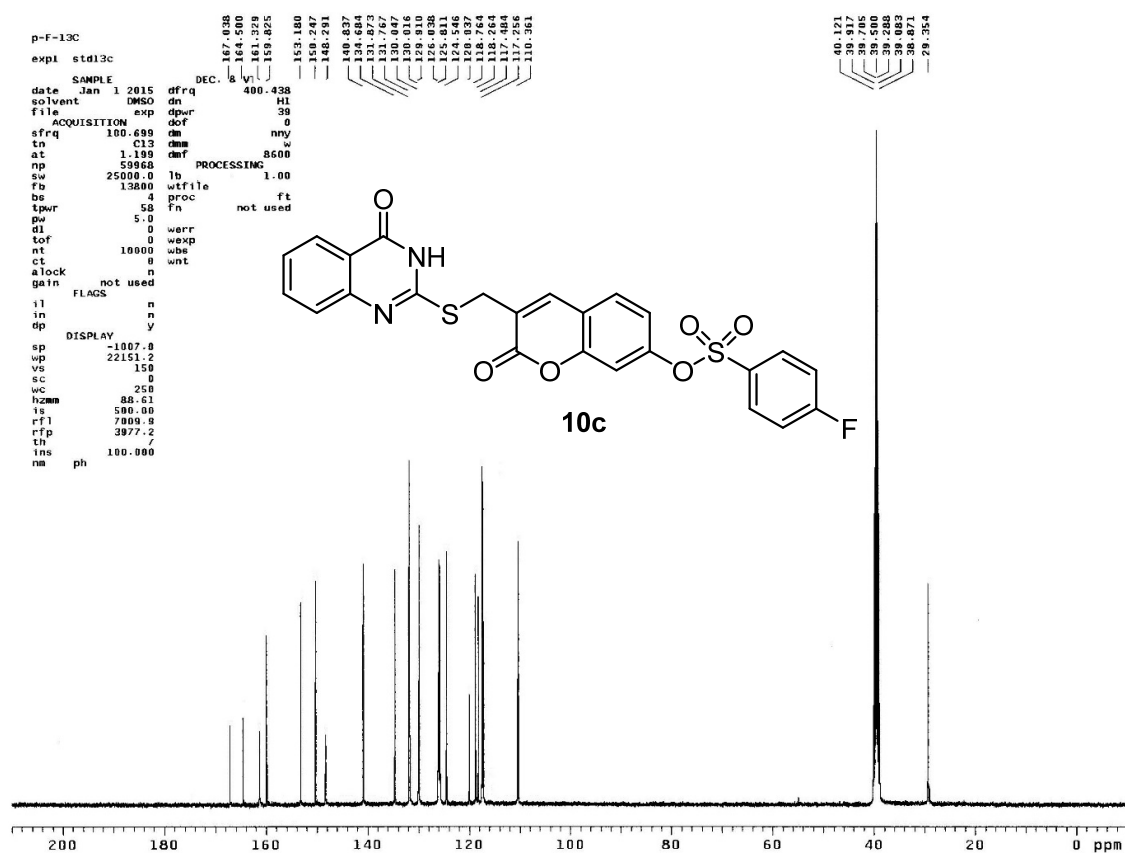

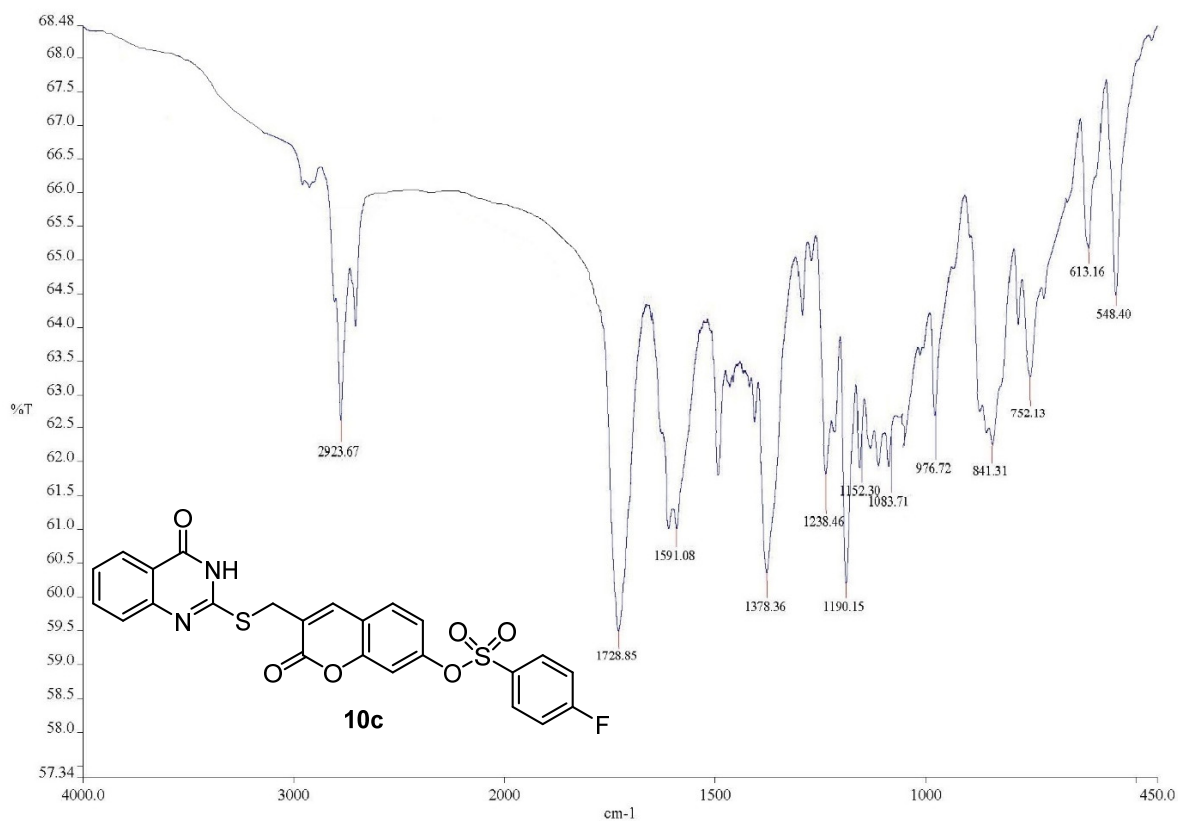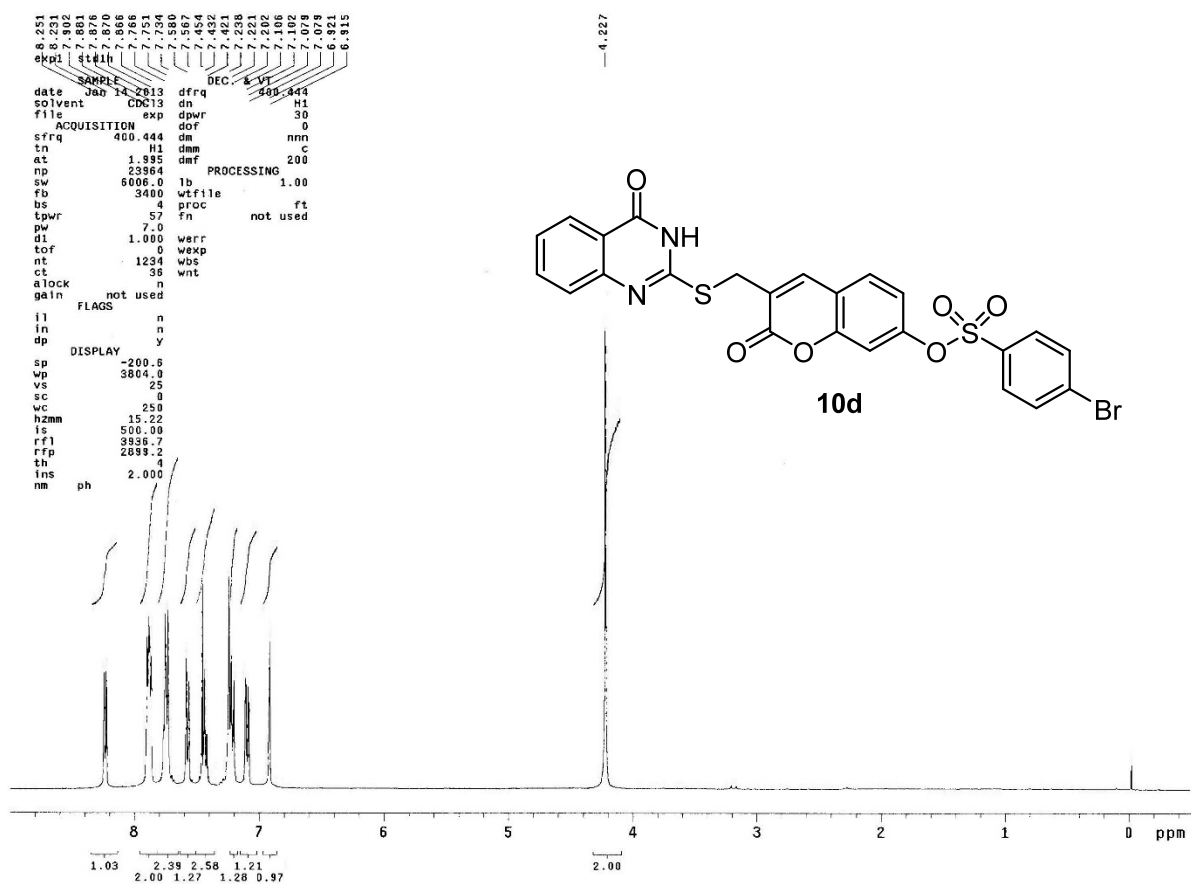



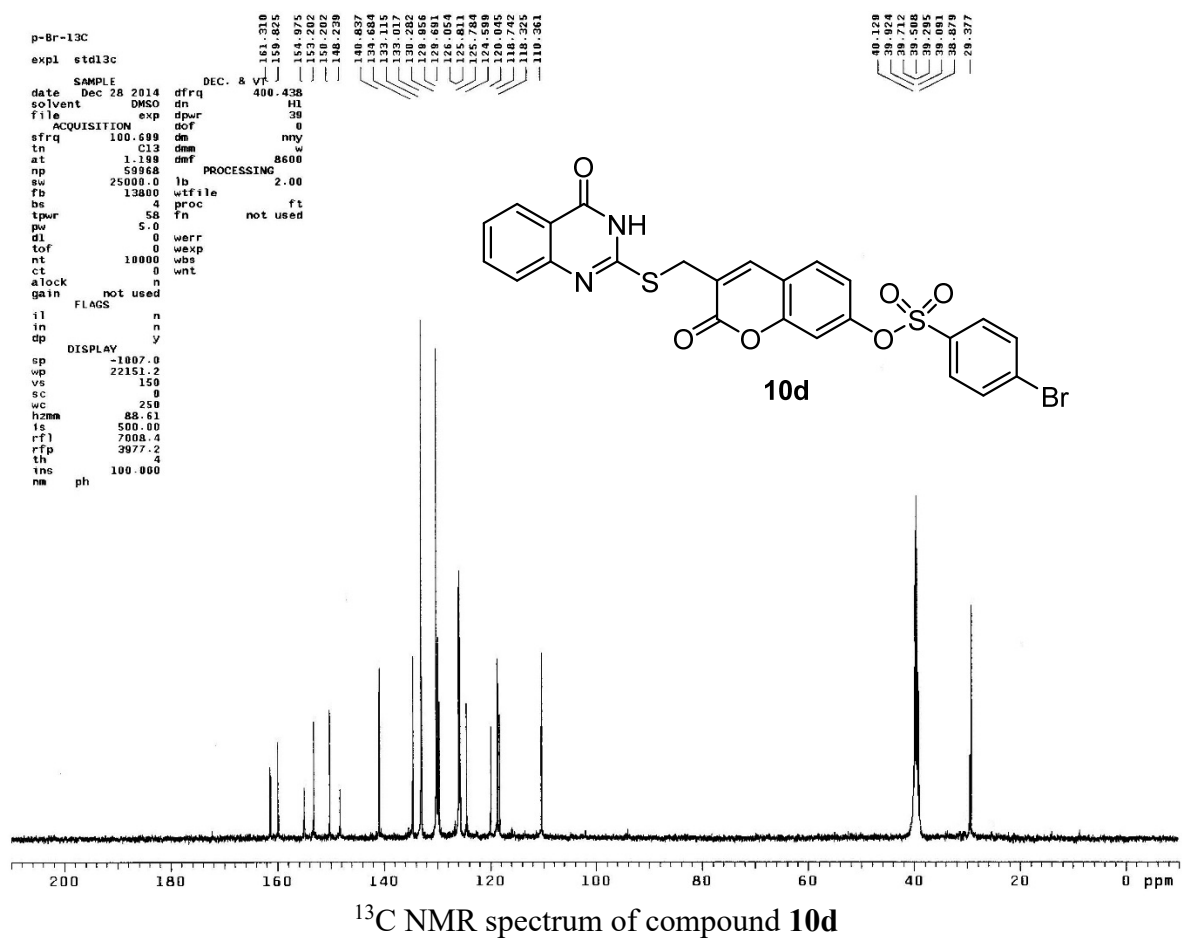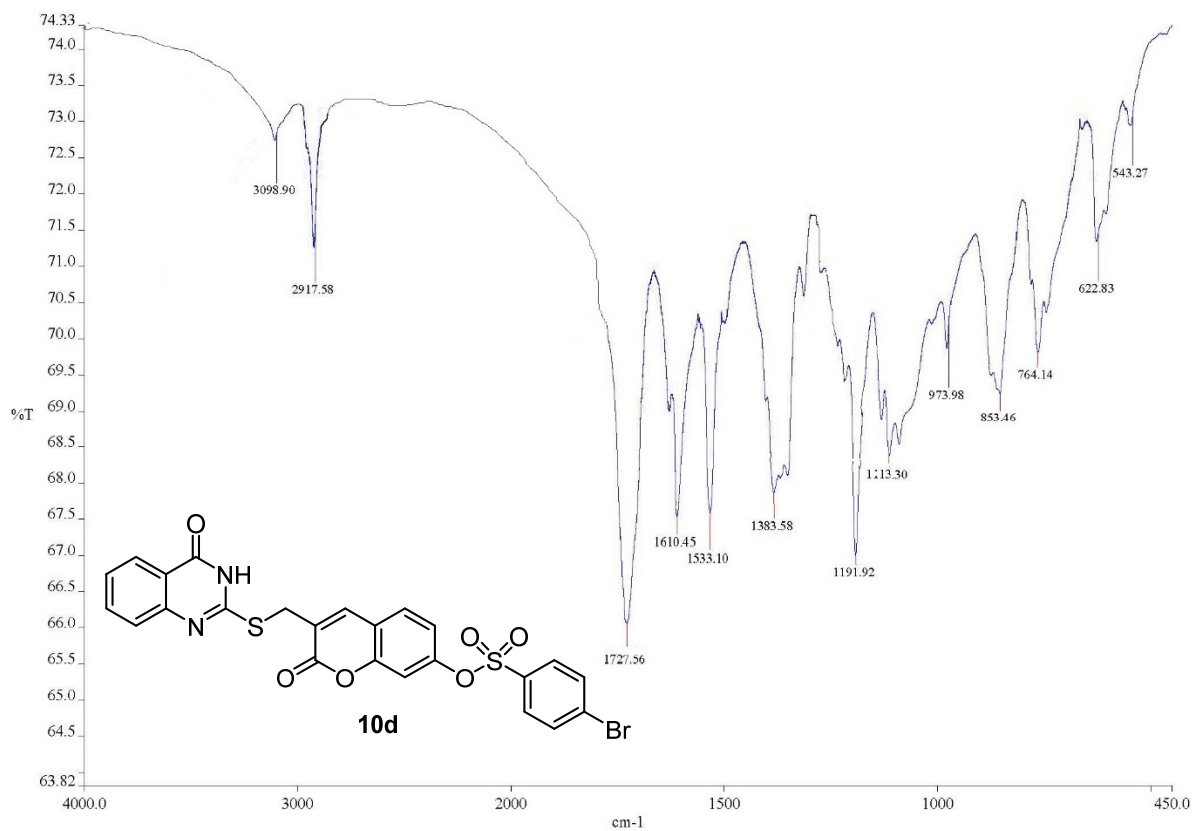

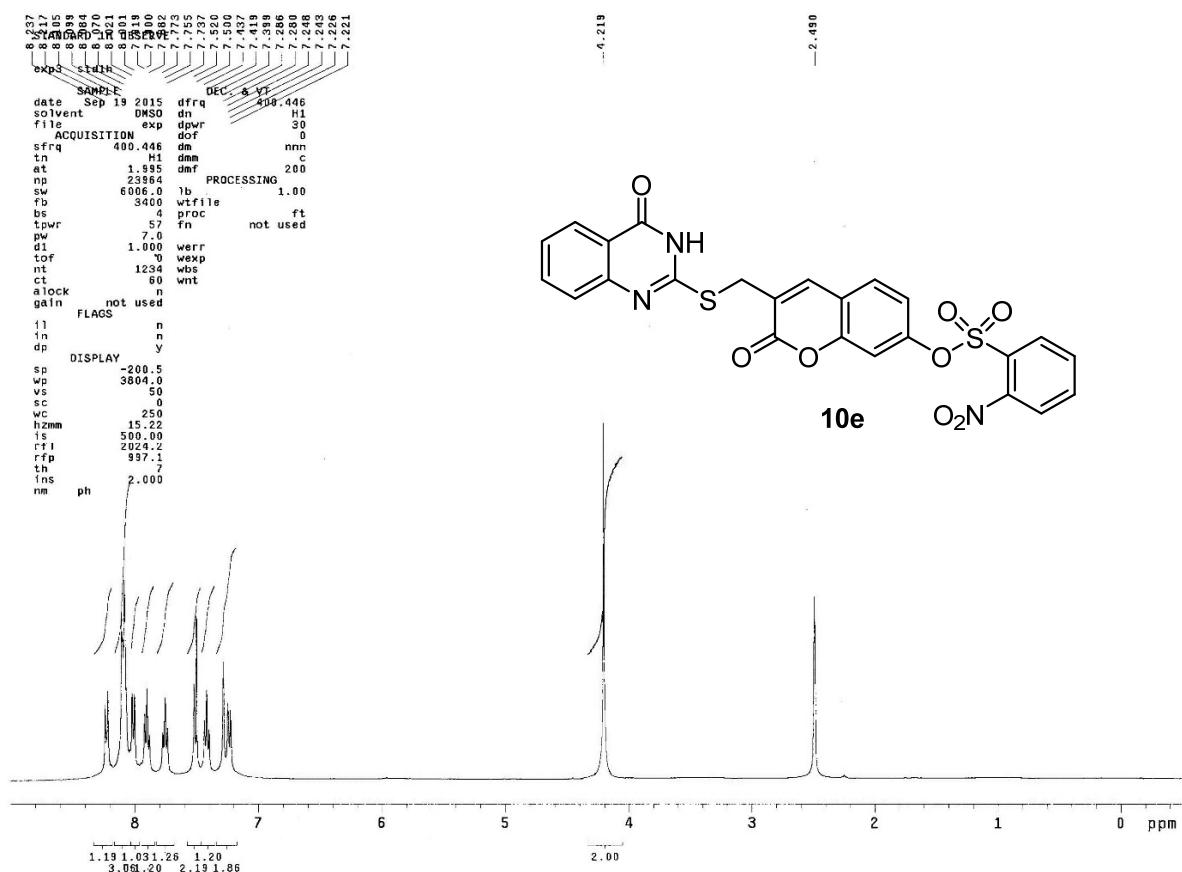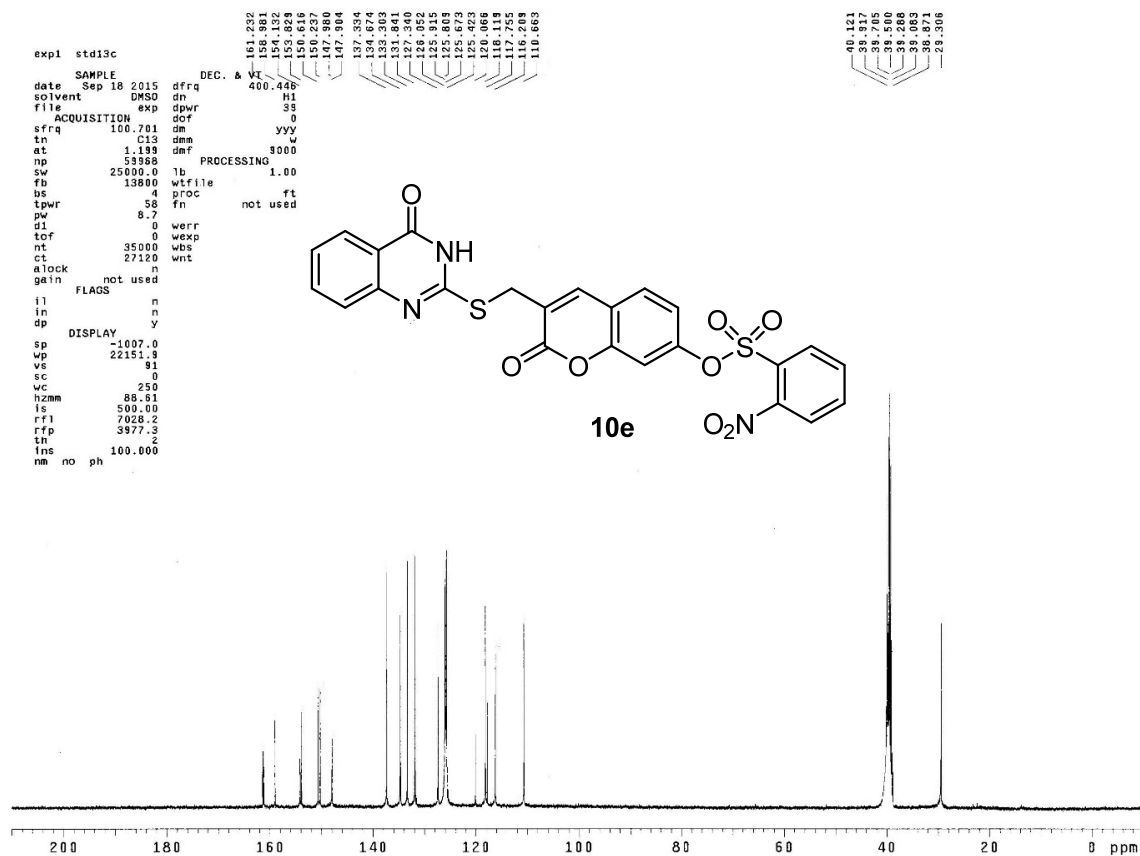

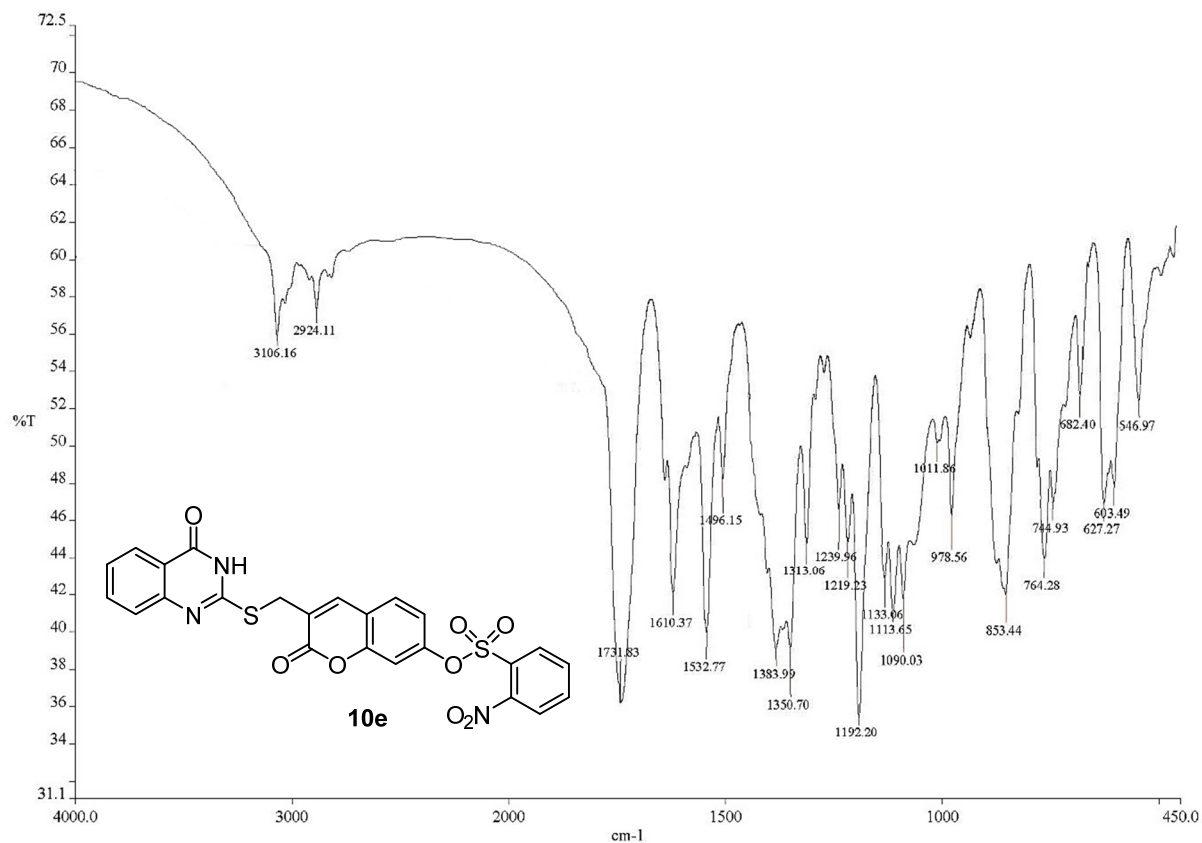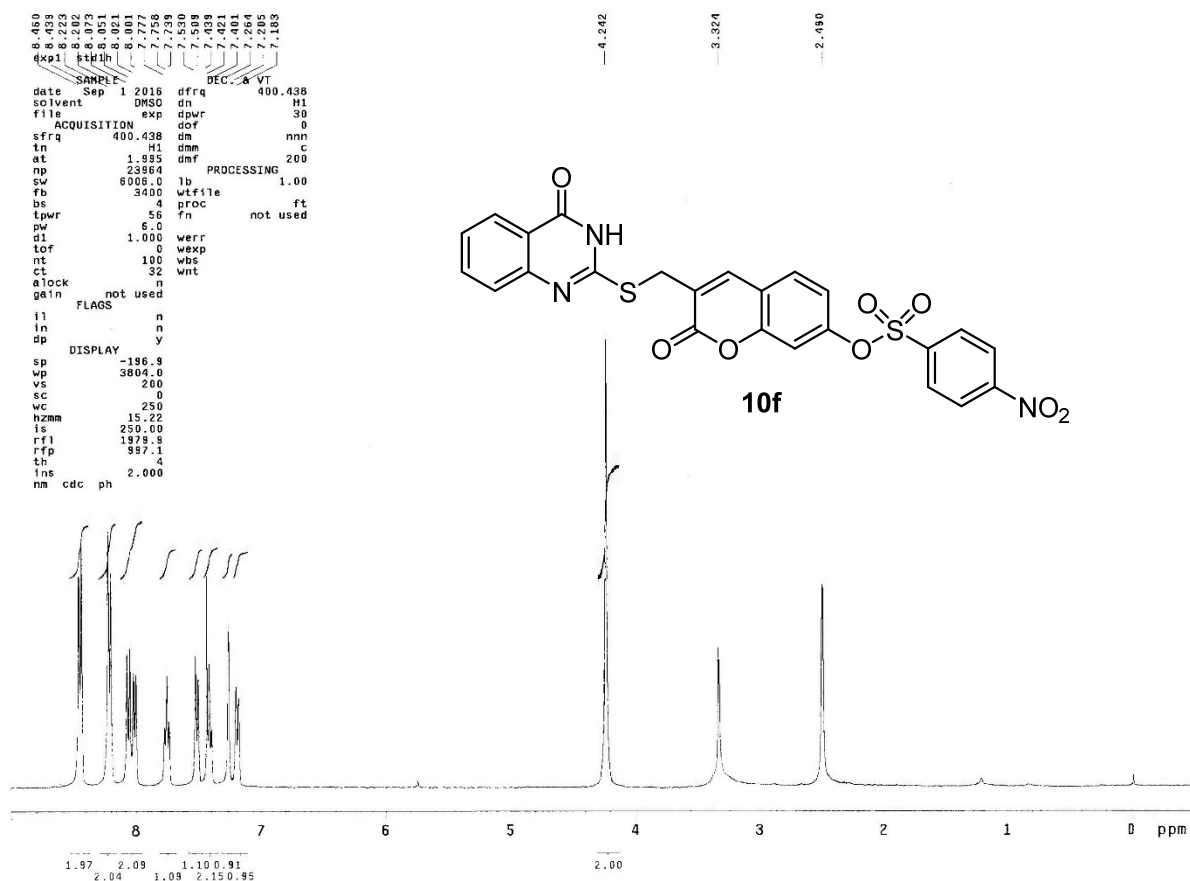

<sup>1</sup>H NMR spectrum of compound **10f**

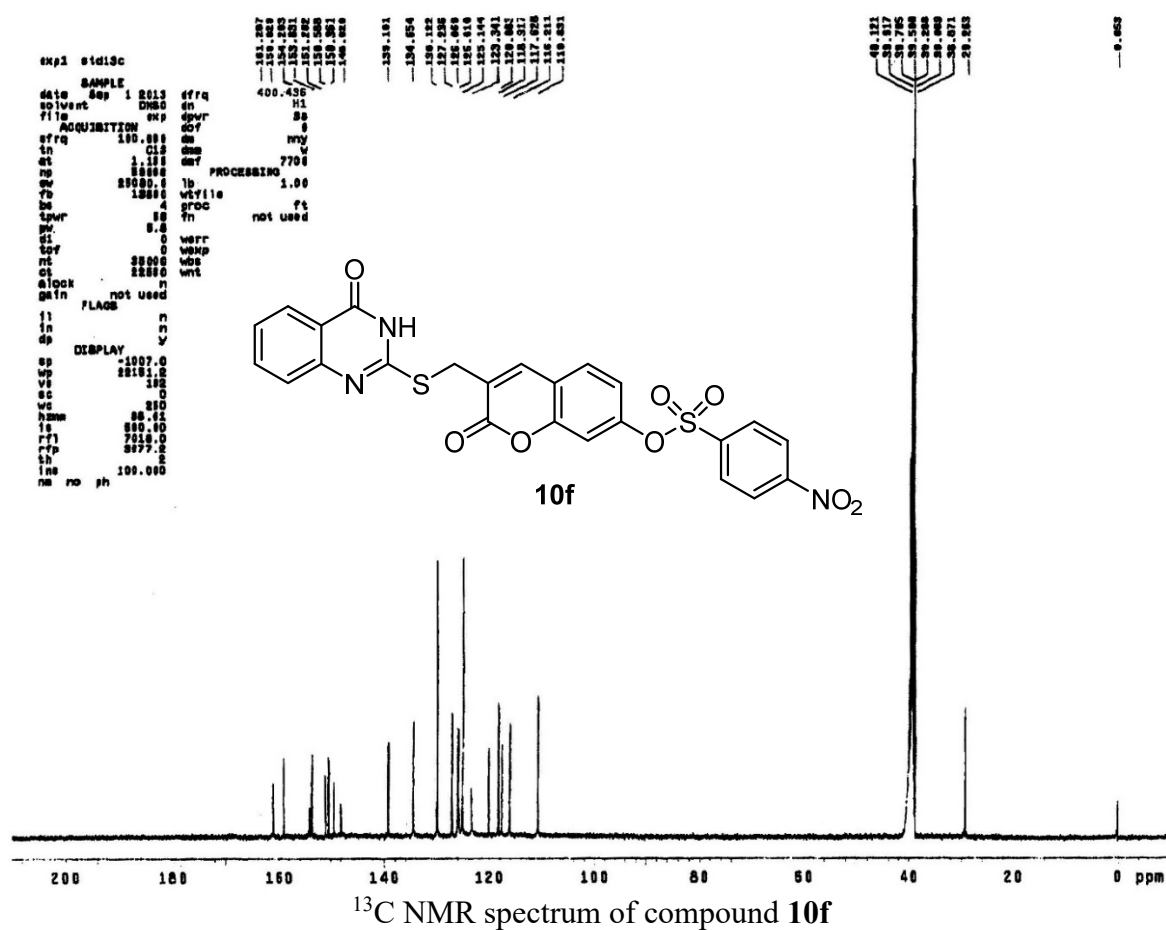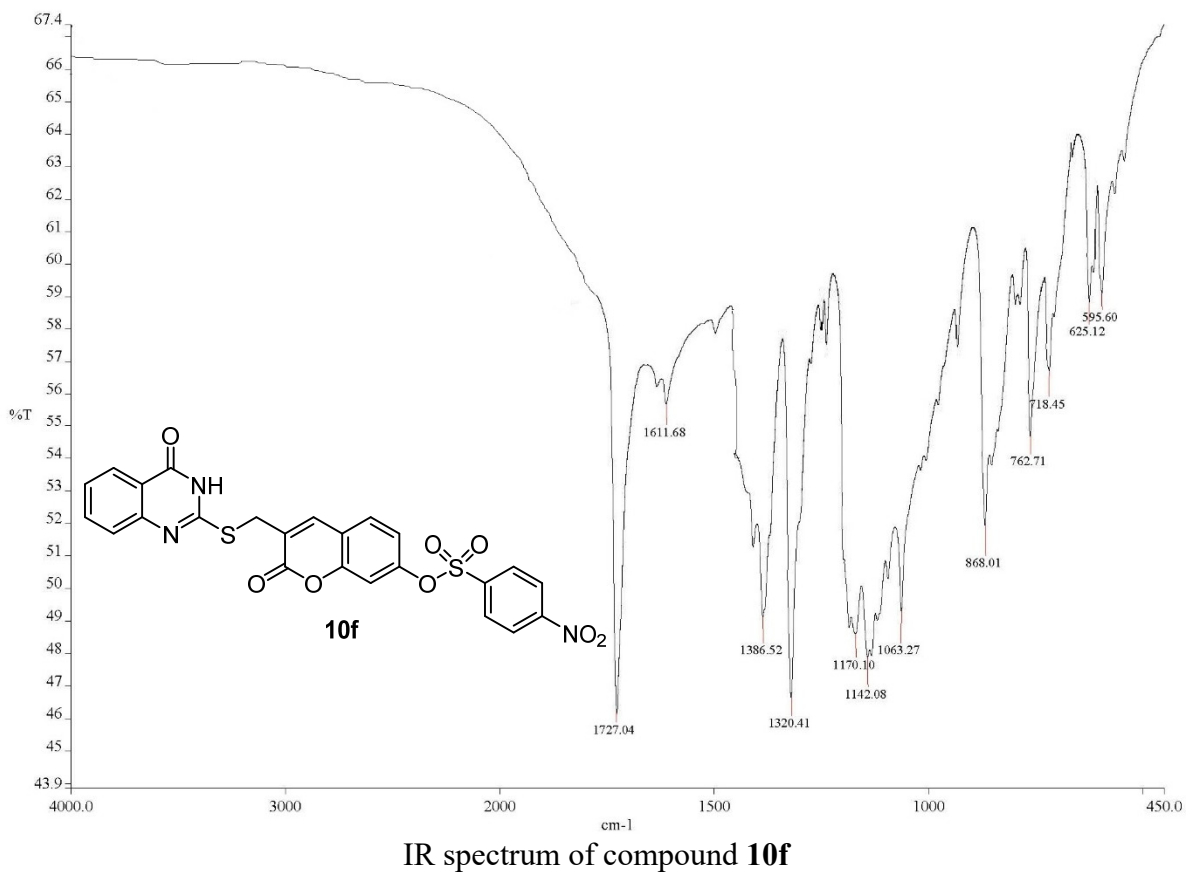

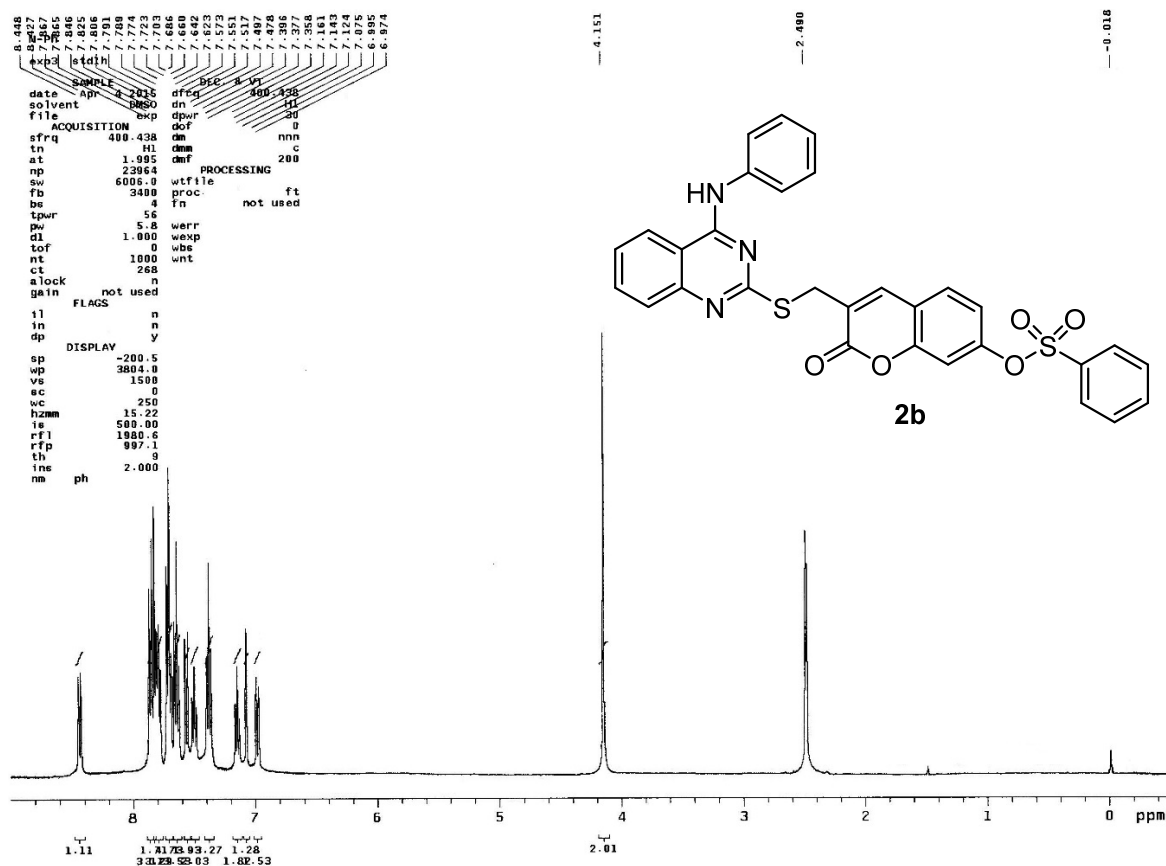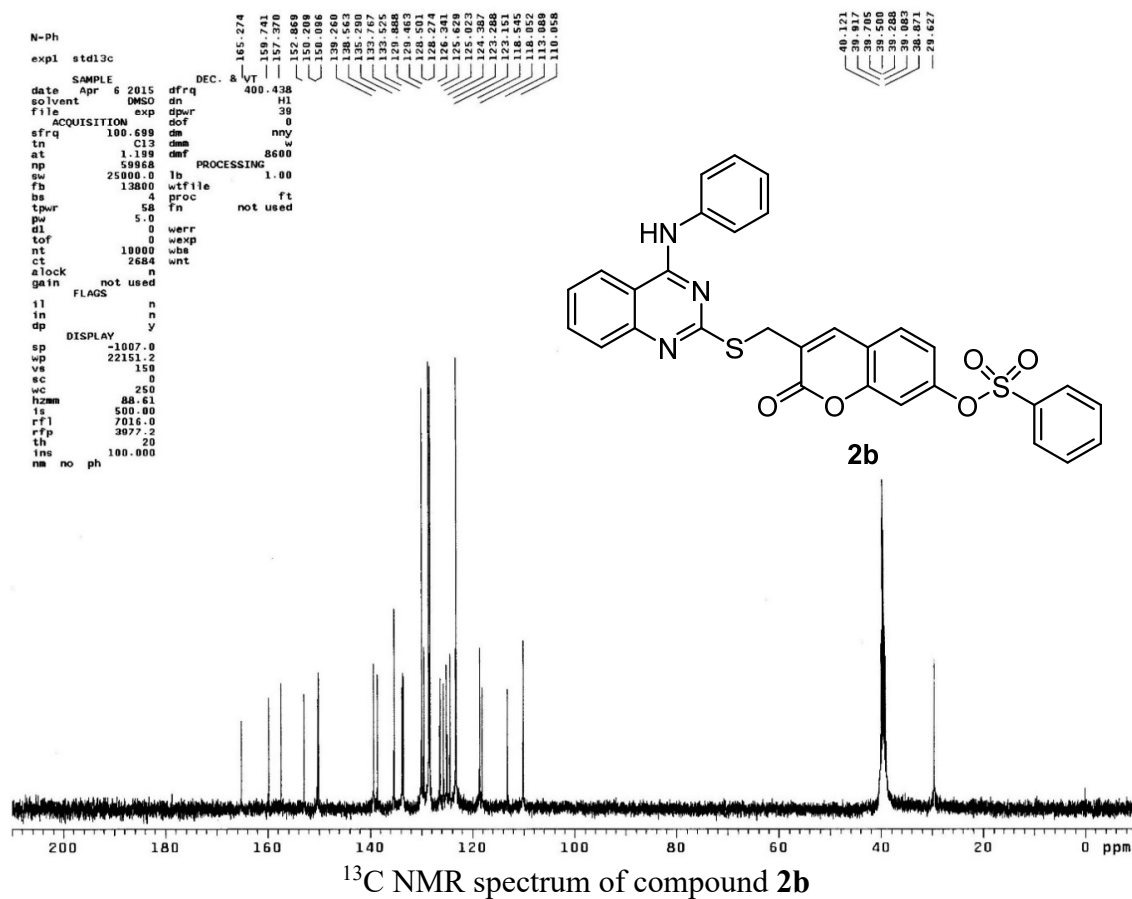

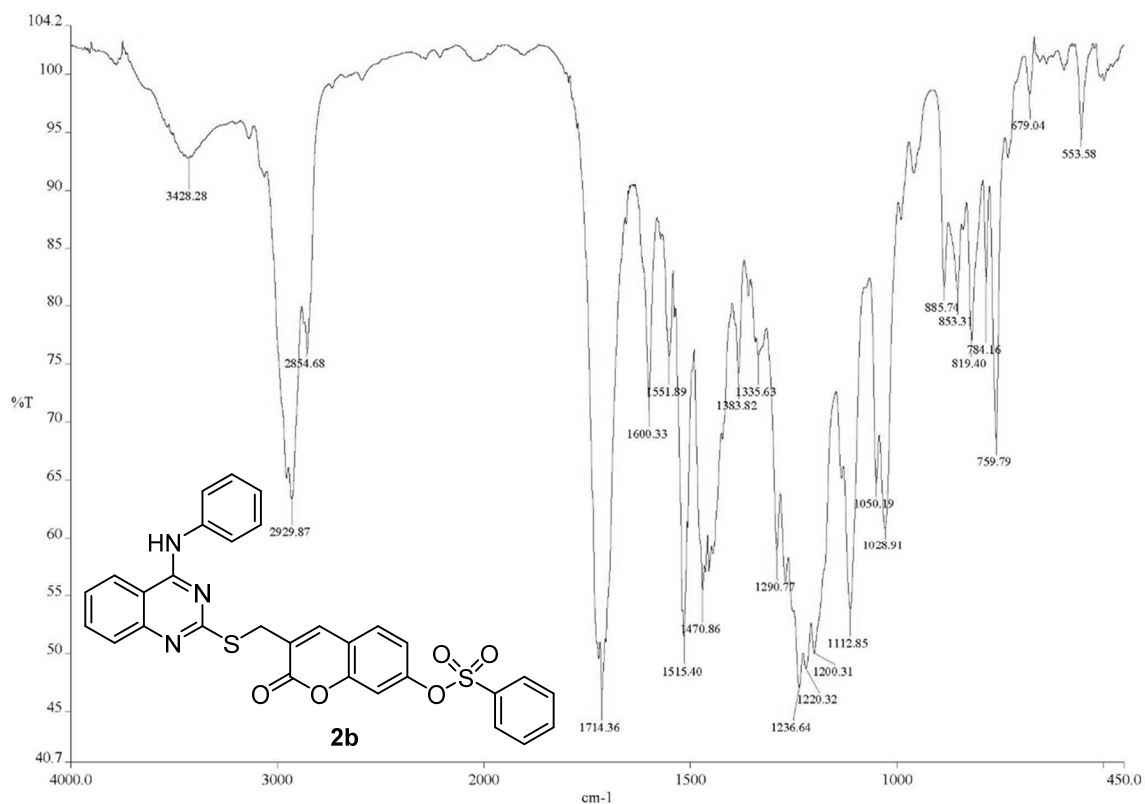

IR spectrum of compound **2b**

## HPLC chromatograms for traces of final compounds

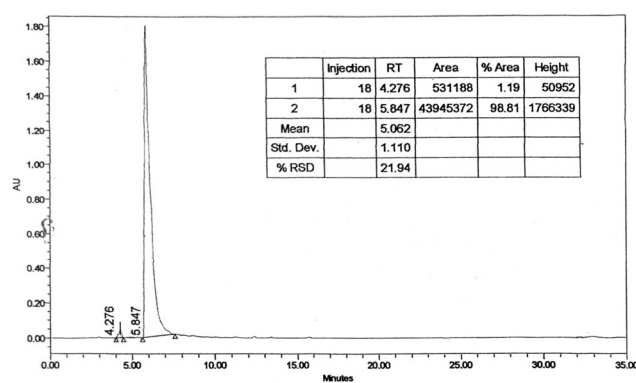

**10a**

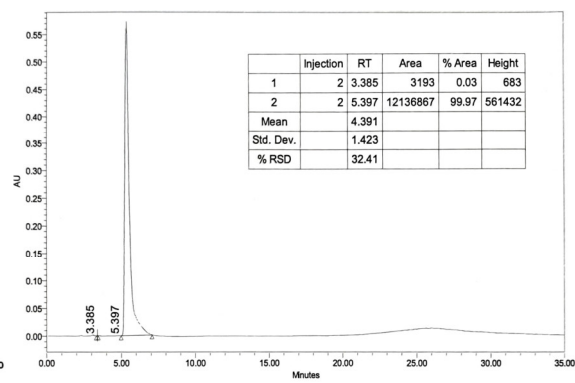

**10b**

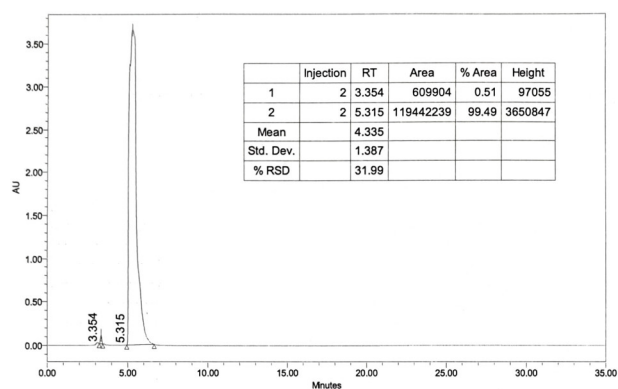

10c

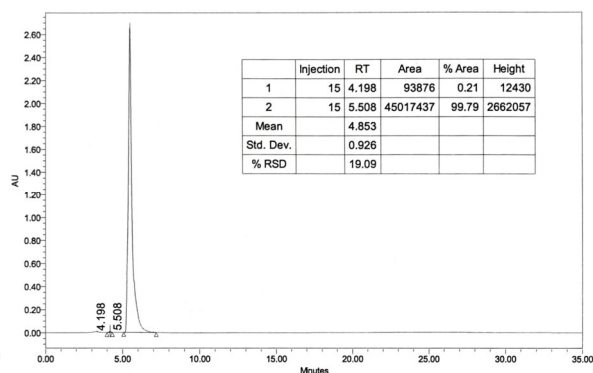

10d

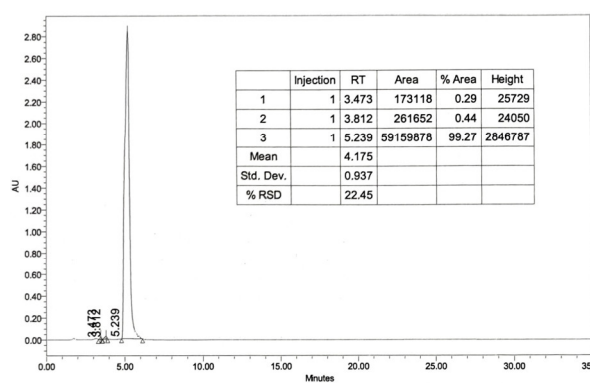

10e

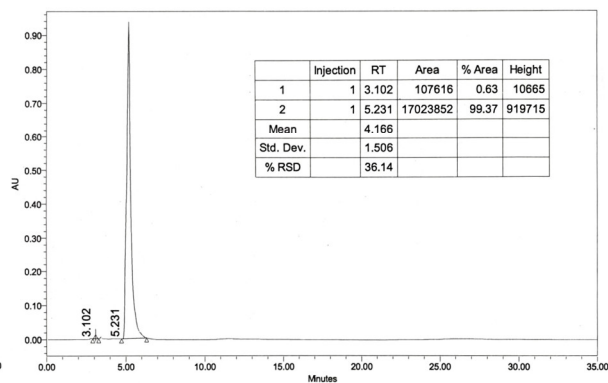

10f

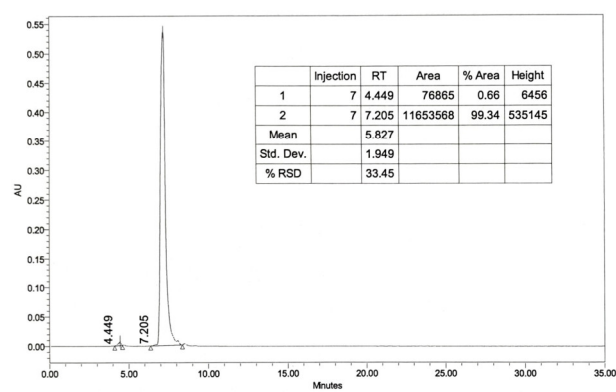

2b
